# Meiotic prophase length modulates Tel1-dependent DNA double-strand break interference

Luz María López Ruiz<sup>1</sup>, Dominic Johnson, William H. Gittens, George Brown, Rachal M. Allison, and Matthew J. Neale<sup>1</sup>

Genome Damage and Stability Centre, School of Life Sciences, University of Sussex, UK

1. For correspondence: [m.neale@sussex.ac.uk](mailto:m.neale@sussex.ac.uk); [L.Lopez-Ruiz@sussex.ac.uk](mailto:L.Lopez-Ruiz@sussex.ac.uk)

## ABSTRACT

During meiosis, genetic recombination is initiated by the formation of many DNA double-strand breaks (DSBs) catalysed by the evolutionarily conserved topoisomerase-like enzyme, Spo11, in preferred genomic sites known as hotspots. DSB formation activates the Tel1/ATM DNA damage responsive (DDR) kinase, locally inhibiting Spo11 activity in adjacent hotspots via a process known as DSB interference. Intriguingly, in *S. cerevisiae*, over short genomic distances (<15 kb), Spo11 activity displays characteristics of concerted activity or clustering, wherein the frequency of DSB formation in adjacent hotspots is greater than expected by chance. We have proposed that clustering is caused by a limited number of sub-chromosomal domains becoming primed for DSB formation. Here, we demonstrate that DSB clustering is abolished when meiotic prophase timing is extended via deletion of the *NDT80* transcription factor. We propose that extension of meiotic prophase enables most cells, and therefore most chromosomal domains within them, to reach an equilibrium state of similar Spo11-DSB potential, reducing the impact that priming has on estimates of coincident DSB formation. Consistent with this view, genome-wide maps of Spo11-DSB formation generated in the absence of Tel1 are skewed towards regions that load pro-DSB factors early—revealing regions of preferential priming—but this effect is abolished when *NDT80* is deleted. Our work highlights how the stochastic nature of Spo11-DSB formation in individual cells within the limited temporal window of meiotic prophase can cause localised DSB clustering—a phenomenon that is exacerbated in *tel1Δ* cells due to the dual roles that Tel1 has in DSB interference and meiotic prophase checkpoint control.

## 33 INTRODUCTION

34 During meiosis, DNA double-strand breaks (DSBs) created by the evolutionarily conserved  
35 topoisomerase-like protein, Spo11, form in a highly regulated manner in order to initiate  
36 genetic recombination between homologous chromosomes<sup>1-3</sup>. Pairing of homologous  
37 chromosomes, mediated by this recombination process, facilitates homologue alignment  
38 during prophase I and subsequent accurate segregation<sup>4,5</sup>. Consequently, failures of either  
39 the initiation or completion of recombination can lead to chromosome segregation errors,  
40 generating inviable gametes<sup>4,6,7</sup>.

41  
42 The regulation of Spo11 activity arises at multiple levels that affect when, where, and how  
43 frequently DSBs are created across the genome<sup>8-11</sup>. In the sexually reproducing budding yeast  
44 *Saccharomyces cerevisiae* nine additional proteins are absolutely required for Spo11 activity,  
45 many of which have conserved functions in other species<sup>12</sup>. Rec102, Rec104 and Ski8, form  
46 the catalytic core with Spo11<sup>13,14</sup>, generating a complex with structural similarity to the  
47 ancestral heterotetrameric protein Topoisomerase VI<sup>1,14-18</sup>. Rec114, Mer2 and Mei4 interact  
48 with one another, bind to the structural axis of the meiotic chromosome, and are thought to  
49 regulate core-complex assembly and/or catalysis<sup>19-22</sup>. Finally, the evolutionarily conserved  
50 Mre11 complex (Mre11, Rad50 and Xrs2/Nbs1), has roles in both the formation and in the  
51 repair of Spo11-DSBs, the latter role performed alongside a critical repair factor component,  
52 Sae2, the orthologue of human CtIP<sup>3,23-28</sup>. In the absence of Sae2 (also known as Com1),  
53 Spo11-DSBs accumulate with Spo11 remaining covalently bound to DSB ends via a 5'  
54 phospho-tyrosine linkage<sup>29-35</sup>—consistent with Spo11's topoisomerase-like mechanism of  
55 DSB formation—enabling locus-specific and genome-wide measurements of Spo11-DSB  
56 formation<sup>36-39</sup>.

57  
58 In *S. cerevisiae*, around 150–200 DSBs are generated during the leptotene-zygotene stages  
59 of meiotic prophase, and are spread in a nonuniform manner across the four copies (two  
60 homologues, each with two sister chromatids) of the 16 chromosomes—a total of ~50 Mbp of  
61 genomic DNA<sup>38,40,41</sup>. When assayed in a population of cells, Spo11 DSBs are found to form  
62 preferentially in regions of nucleosome depletion and are termed hotspots<sup>38,42,43</sup>. Spo11-DSB  
63 frequency within hotspots is influenced by many proactive features of the chromosome  
64 topography, including DNA replication dynamics<sup>44-46</sup>, gene organisation<sup>38,47</sup>, cohesin  
65 binding<sup>48,49</sup> and nucleosome modification<sup>38,50,51</sup>, alongside higher-order chromosomal  
66 architectures such as centromeres, telomeres<sup>38,40,47,52,53</sup> and repetitive elements<sup>38,54,55</sup>, which  
67 collectively influence the local and broad-range loading of Spo11 and other pro-DSB factors  
68 to chromosomes<sup>19,38,47</sup>. In addition, greater-than-expected coincidence of Spo11-DSB  
69 formation in adjacent hotspots<sup>56</sup> (clustering), suggests that on a per-cell basis, subdomains of

70 pro-DSB activity assemble upstream of DSB cleavage at different locations in different  
71 cells<sup>10,56</sup>, but what defines and regulates their formation is unclear.

72

73 Spo11-DSB formation is also regulated reactively. As a potentially toxic DNA lesion,  
74 unrepaired Spo11 DSBs are recognised by the DNA damage response (DDR) kinases Tel1  
75 and Mec1, the *S. cerevisiae* orthologues of the human checkpoint kinases Ataxia  
76 Telangiectasia Mutated (ATM) and AT-related (ATR), respectively<sup>57</sup>. Tel1 activation directly  
77 inhibits further Spo11-DSB formation in a process described as DSB interference<sup>56,58–60</sup>. Such  
78 negative regulation appears to act relatively locally, reducing the probability of coincident  
79 DSBs arising in adjacent hotspots, a phenomenon otherwise referred to as inter-hotspot  
80 double cutting<sup>56</sup>. Notably, such inhibition indirectly reduces the global Spo11-DSB  
81 frequency<sup>56,59–61</sup>, including a reduction in the formation of hyper-localised double cuts (DCs)  
82 that form within Spo11 hotspots<sup>41,62</sup>.

83

84 Despite clear roles for Tel1 in the negative regulation of Spo11 (a conserved role carried out  
85 by ATM in mouse, plants, and flies<sup>63–68</sup>), the critical target(s) of the Tel1 kinase that translate  
86 such negative regulation remain obscure, with Rec114 the main lead<sup>59,60,69</sup>. Tel1, and its sister  
87 kinase, Mec1, also have roles in biasing DSBs to repair using the homologous chromosome  
88 and in checkpoint activation—delaying the onset of meiotic nuclear divisions as part of the  
89 DNA damage response—both via activation of the meiosis-specific Rad53/CHK2 orthologue,  
90 Mek1<sup>70–76</sup>. Furthermore, global down-regulation of Spo11-DSB formation is mediated via both  
91 the establishment of successful homologous chromosome interaction (termed homologue  
92 engagement<sup>77</sup>) and by the checkpoint-regulated exit from meiotic prophase via activation of  
93 the Ndt80 transcription factor<sup>59</sup>, which is involved in the regulation of genes involved in later  
94 stages of sporulation<sup>73,78–82</sup>. Thus, whilst some activities of Tel1 promote meiosis-specific  
95 modes of DSB repair, contemporaneous checkpoint activation—mediated by Tel1 and  
96 others—may increase the time that cells remain in earlier stages of meiotic prophase, and  
97 thereby remain in a DSB-permissive state. However, precisely whether and how DSB  
98 interference is affected by prophase timing regulation has not been characterised.

99

100 Here, we utilise deletion of *NDT80* to explore the influence that meiotic prophase kinetics has  
101 on the process of Tel1-dependent DSB interference using both locus-specific assays and by  
102 assessing changes to the global genome-wide patterns of Spo11-DSB formation. We  
103 demonstrate that short-range DSB interference—and the manifestation of clustering—is  
104 modulated by prophase length. We further provide evidence that genome-wide patterns of  
105 DSB formation are influenced by both Tel1 and Ndt80—the latter of which we exploit to reveal  
106 chromosomal domains of preferred DSB activity.

## 107 RESULTS

### 108 Deletion of *TEL1* accelerates exit from meiotic prophase in *sae2Δ* cells

109 We previously demonstrated that Spo11-dependent DNA double-strand break (DSB)  
110 formation in *S. cerevisiae* is reactively inhibited in response to a proximal DSB, via the  
111 evolutionarily conserved PIKK kinase, Tel1<sup>56</sup> (**Fig 1a**). Importantly, Tel1 has been implicated  
112 in prophase checkpoint activation in *rad50S* cells—in which Spo11 DSBs accumulate without  
113 resection—causing *TEL1* mutants to exit meiotic prophase prematurely<sup>70</sup>. Similarly, we  
114 hypothesised that abrogation of Tel1 activity might also accelerate prophase exit (**Fig S1a**),  
115 reducing the time-window of opportunity for DSB formation in the cell populations used for our  
116 studies, which employed a deletion of the Mre11 nuclease cofactor, *SAE2*, in order to permit  
117 unresected Spo11-DSB signals to accumulate<sup>25,26,29,31</sup>.

118  
119 To test this idea, we compared meiotic prophase kinetics by monitoring the time at which cells  
120 completed the first meiotic nuclear division (MI) in synchronised meiotic cultures (**Fig 1b, S1b-**  
121 **d**). Whilst wild-type cultures started to initiate MI at ~5 hours, with MI complete in 80% of the  
122 population by 10 hours, *sae2Δ* cells were delayed by ~2-3 hours (**Fig 1b**), similar to *rad50S*  
123 mutants<sup>70</sup>. By contrast—but again like in the *rad50S* background<sup>70</sup>—deletion of *TEL1* in the  
124 *sae2Δ* background substantially rescued this delay (**Fig 1b**).

125  
126 These observations confirm that *sae2Δ* cells exit meiotic prophase earlier in the absence of  
127 Tel1, which may cause some cells to have less opportunity to initiate Spo11-DSB formation  
128 than in the presence of Tel1.

### 130 Deletion of *NDT80* increases DSB formation in the absence of Tel1

131 We hypothesised that deletion of the *NDT80* transcription factor, causing meiotic cells to arrest  
132 permanently in late prophase<sup>81</sup>, might equalise the length of time cells remain in prophase—  
133 and thus their DSB-forming potential—independently of the presence or absence of Tel1  
134 activity (**Fig S1e**). To test this idea, we first determined the impact of extending meiotic  
135 prophase (*NDT80* deletion) on the overall frequency of DSB formation at a number of strong  
136 hotspots previously used to assess DSB interference<sup>56</sup>: *HIS4::LEU2* (**Fig 1c**), *ARE1* (**Fig S2a**),  
137 and *YCR061W* (**Fig S3a**).

138  
139 At *HIS4::LEU2*, DSB frequency increased over time reaching a maximum at 6-8 h after meiotic  
140 induction of ~10% at site I and ~5% at site II in the *sae2Δ* control (**Fig 1d-g**), frequencies that  
141 were not substantially altered upon *NDT80* deletion (**Fig 1f-h**). As previously reported<sup>56</sup>,  
142 deletion of *TEL1* in the *sae2Δ* background increased DSB frequency by around ~1.5-fold at  
143 both sites (**Fig 1d-h**). Remarkably, however, DSB frequency was further elevated (by almost

144 two-fold) in the *sae2Δ tel1Δ ndt80Δ* triple mutant, with total (DSB I + DSB II) levels reaching  
145 ~46% of total DNA (**Fig 1h**). Notably, DSB I signals, as measured with the *MXR2* probe,  
146 showed partial smearing down the gel suggesting a general increase in hotspot width, perhaps  
147 caused by the increase in the frequency of hyper-localised coincident cutting by Spo11 that  
148 arises within hotspots<sup>41,62</sup> (**Fig 1d**).

149  
150 DSB frequencies measured around the *ARE1* locus were both increased by deletion of *NDT80*  
151 in the *sae2Δ tel1Δ* background, reaching levels higher than those previously reported for when  
152 Ndt80 is present<sup>56</sup> (**Fig S2b-f**). At the *YCR061W* locus, the effect at individual hotspots varied  
153 (**Fig S3b-f**). Hotspot 'N' was increased by *TEL1* deletion, but not further by *NDT80* deletion  
154 (**Fig S3d**), whereas hotspot 'Q' was increased more by *NDT80* deletion than by *TEL1* deletion  
155 (**Fig S3f**). Notably, deletion of *TEL1* leads to the formation of a previously undetectable hotspot  
156 "O" (**Fig S3c**) flanking the *YCR061WI* probe (also detected in genome-wide CC-seq<sup>39</sup> maps  
157 of Spo11 DSBs; **Fig S3a**), and this hotspot was increased a further two-fold upon *NDT80*  
158 deletion (**Fig S3e**).

159  
160 Collectively, such observations support the view that early exit from meiotic prophase that  
161 happens in *sae2Δ tel1Δ* cells leads to an underestimate of the total DSB potential that is  
162 possible when Tel1 is absent, and that this can be revealed by arresting cells in late meiotic  
163 prophase via *NDT80* deletion.

### 164 165 **Deletion of *NDT80* alters measurements of DSB interference over short range**

166 In prior work we determined that, rather than just displaying loss of DSB interference in the  
167 absence of Tel1, over short genomic distances Spo11 DSBs were found to arise coincidentally  
168 more often than expected by chance—a phenomenon referred to as negative interference  
169 and/or clustering (**Fig 1a**, inset). We previously hypothesised that this clustering effect arises  
170 due to activation of DSB formation within a subset of meiotic chromatin loop domains<sup>56</sup>. Such  
171 apparent clustering can arise when an assayed population is nonhomogeneous—for example  
172 when it contains a population of active and inactive loci and/or cells—which could become  
173 especially apparent within the shortened prophase of *tel1Δ* cells.

174  
175 Thus, to test the idea that differences in prophase length could explain our observation of  
176 negative interference and DSB clustering, we sought to re-measure DSB interference in the  
177 absence of Ndt80—which we hypothesised would increase the homogeneity of the assayed  
178 cell population. DSB interference was measured, as in our prior study (see **Fig S1f-I** for a  
179 description of the general method of calculation), at the *HIS4::LEU2* locus on chromosome III,  
180 in which the pair of strong Spo11 DSBs are separated by just 2.4 kb (**Fig 1c**).

181  
182 Interference was assessed by comparing the observed frequency of coincident DSBs ('double-  
183 cuts'; 'DCs', measured with the *LEU2* probe; **Fig 1i-k**) to the product of the frequency  
184 (expected) of each individual DSB (DSB I and DSB II; **Fig 1l**) measured using the *MXR2* and  
185 *HIS4* probes on the left and right of the locus respectively (**Fig 1c-h**; see Extended methods,  
186 "Calculation of DSB interference" for full description). Because DSBs and DCs accumulated  
187 over time (**Fig 1f-g,j**), to simplify analysis and reduce sampling error, the 6 and 8 hour time  
188 points were averaged, and then this average value was calculated across a number of  
189 independent experimental repeats made in both the *NDT80*+ control (n=6) and *ndt80* $\Delta$  mutant  
190 (n=5) backgrounds (**Fig 1h,k**).

191  
192 Aggregation of additional observations made in this study with prior measurements<sup>56</sup>  
193 reinforced the prior conclusion: that is, in the presence of Tel1, a similar frequency of DCs  
194 were observed to those that were expected (**Fig 1l**), suggesting no interference over this short  
195 distance even though Tel1 is present (and thus the formation of DCs inhibited; **Fig 1m**). *TEL1*  
196 deletion led to a ~1.5-fold increase in the frequency of single DSBs (**Fig 1h**), but a  
197 disproportionate ~10-fold increase in the frequency of DCs (**Fig 1k**)—demonstrating not just  
198 Tel1's inhibitory role, but also how observed DCs then exceed by ~3-fold those expected by  
199 chance alone (**Fig 1l**), leading to a negative interference calculation (**Fig 1m**).

200  
201 Remarkably, in the presence of Tel1—but now in the absence of Ndt80—although single DSB  
202 frequency increased a small amount (**Fig 1h**), DC frequency was unchanged (**Fig 1k**), and at  
203 a lower frequency than expected (**Fig 1l**), leading to positive interference (**Fig 1m**). Moreover,  
204 in the absence of Tel1 and Ndt80, single DSB frequencies increased further (**Fig 1h**), but  
205 without any increase in DCs relative to *tel1* $\Delta$  (**Fig 1k**), leading observed and expected  
206 frequencies of DCs to be similar (**Fig 1l**), and therefore, an absence of interference (**Fig 1m**).

207  
208 To test whether similar effects were observed elsewhere, we also measured DSB and DC  
209 formation between the three main hotspots (labelled 'E', 'F', and 'I') flanking the *BUD23–ARE1*  
210 locus on chromosome III<sup>56</sup> (**Fig S2a**). Although other minor DSBs (and thus DCs) are also  
211 visible, their low cutting frequency and the relatively high lane background precluded their  
212 accurate measurement in this study. Deletion of *NDT80* increased single DSB frequencies in  
213 both the presence and the absence of Tel1 (**Fig S2b-f**) but without any major changes in DC  
214 frequencies relative to the large effect caused by *TEL1* deletion (**Fig S2g-j**). In agreement with  
215 the measurements made at *HIS4::LEU2* above, these effects altered DSB interference (**Fig**  
216 **S2k-n**) such that control *TEL1*+ *ndt80* $\Delta$  cells displayed strong positive interference (**Fig S2m-**

217 **n**; rather than weak interference), and *tel1Δ ndt80Δ* cells now displayed weak/absent  
218 interference (**Fig S2m-n**; rather than strong negative interference).

219

220 DSB interference measurements at a third locus (*YCR061W*) were more complicated,  
221 although displaying some similar trends (**Fig S3**). Measuring DC formation between the main  
222 hotspot, 'N', and hotspot 'Q', 3.7 kb away (**Fig S3g-i**), and therein calculating DSB interference  
223 (**Fig S3j-m**), showed that—similar to at *HIS4::LEU2* and *ARE1*—deletion of *NDT80* when Tel1  
224 is absent causes a substantial reduction in the negative interference previously observed<sup>56</sup>  
225 between hotspots N and Q (**Fig S3I**). However, potentially due to low signals and relatively  
226 high background levels (**Fig S3g-h**), we were unable to detect any change in interference  
227 upon deletion of *NDT80* in the presence of Tel1 (**Fig S3I**; see Extended Methods for more  
228 details). There was also no measured change in (the negative) interference detected between  
229 hotspot N and the new hotspot, O, that arises only in the *tel1Δ* background (above, **Fig**  
230 **S3a,m**)—possibly due to a combination of O being a weak, dispersed hotspot, the very short  
231 distance between hotspot N and O (~0.7 kb), and the partially overlapping probe location (see  
232 Extended Methods for more details).

233

234 In summary, whilst somewhat variable at individual loci, these observations support the view  
235 that the previously intriguing observation that over short distances Spo11 DSBs failed to  
236 display interference in the presence of Tel1 and displayed negative interference in the  
237 absence of Tel1, is influenced by Ndt80. Specifically, when meiotic prophase is extended via  
238 *NDT80* deletion, adjacent DSBs now generally display positive interference in the presence of  
239 Tel1, but little or no interference in the absence of Tel1.

240

#### 241 **Deletion of *NDT80* does not alter DSB interference over medium distances**

242 We next explored the impact of deleting *NDT80* on DSB interference measured over medium  
243 distances (**Fig 2**; **Fig S4**)—starting with the ~28 kb interval between the *HIS4::LEU2* and  
244 *leu2::hisG* hotspot loci inserted on the left arm of chromosome III<sup>56</sup> (**Fig 2a**). As measured  
245 using a probe close to the end of the chromosome (*CHA1*), deletion of *NDT80* and/or deletion  
246 of *TEL1* led to an increase in DSB formation at *HIS4::LEU2*, and in an additive manner (**Fig**  
247 **2b-c**). By contrast, DSB measurements at the *leu2::hisG* locus were more variable, on  
248 average displaying no clear trend (**Fig 2d**).

249

250 Whilst DCs between *HIS4::LEU2* and *leu2::hisG* (measured by the *FRM2* probe) were at or  
251 below the detection limit in the presence of Tel1, DCs were readily induced in the absence of  
252 Tel1 (**Fig 2e-f**). Deletion of *NDT80* had little effect on DC formation in the presence of Tel1,  
253 but caused a substantial (albeit variable) increase in the absence of Tel1 (**Fig 2e-f**).

254 Importantly, the concomitant increases in both single DSB frequencies (**Fig 2c**) and DC  
255 frequencies (**Fig 2f**) upon *NDT80* deletion, generated no changes in the ratios of observed to  
256 expected DC formation (**Fig 2g**), and as a result no change in measurements of DSB  
257 interference between these loci (**Fig 2h**).

258  
259 In agreement with these findings, measuring DSB and DC frequencies and DSB interference  
260 between the *ARE1* and *YCR061W* loci, separated by ~14 kb (**Fig S4a**), demonstrated that  
261 although DC frequencies were modestly increased upon *NDT80* deletion (both in the presence  
262 and absence of Tel1; **Fig S4b**), this did not change the measurements of DSB interference  
263 (**Fig S4c**).

264  
265 Taken together, these observations underscore the view that whilst Tel1-dependent DSB  
266 interference acts over both short and medium scales, the observation of negative interference  
267 over short distances in *tel1Δ* mutants appears uniquely influenced by *NDT80* status.

268

### 269 **Deletion of *NDT80* alters the genome-wide DSB distribution in the absence of Tel1**

270 We recently developed covalent-complex sequencing (CC-seq), a high-resolution and  
271 genome-wide sequencing method to detect and characterise the covalent Spo11-DSB  
272 intermediates that accumulate in meiosis when *SAE2* is deleted<sup>39</sup> (**Fig 3a**). Based on the  
273 observations made above, we next sought to use CC-seq to explore the effects that Ndt80  
274 and Tel1 may have on DSB formation at a genome-wide scale.

275

276 Taking the lead from prior work that mapped the transient Spo11-oligo intermediates liberated  
277 from Spo11-DSB ends in wild-type cells<sup>38,60</sup>, we first simplified the data into a set of ~3400  
278 Spo11-DSB hotspots characterised by their local enrichment of reads (**Fig S5a**). The locations  
279 of these hotspots overlapped well (>85% congruence) with prior hotspot positions called from  
280 Spo11-oligo data in wild-type cells<sup>38,60</sup> (**Fig S5b-c**). Residual differences are likely caused by  
281 a combination of methodological (Spo11-oligo seq vs CC-seq) and real (*SAE2+* vs *sae2Δ*  
282 genotypes, and presence/absence of tags on Spo11 itself) effects, and were  
283 disproportionately associated with weaker hotspots (**Fig S5d-f**). Notably, only a minority  
284 (32/3473; <1%) of hotspots called from the CC-seq data were also present in a *sae2Δ ndt80Δ*  
285 *spo11-Y135F* control sample in which the catalytic activity of Spo11 is disabled (**Fig S5g**), and  
286 these were all weak (**Fig S5h**), underscoring the utility of CC-seq for measuring bona fide  
287 Spo11-DSB formation at a genome-wide scale.

288

289 Hotspot strengths were highly positively correlated between *sae2Δ* and *sae2Δ ndt80Δ* samples  
290 (Pearson R=0.98; **Fig 3b**), but slightly less so in the *sae2Δ tel1Δ* and *sae2Δ tel1Δ ndt80Δ*



291 samples (Pearson  $R=0.92$ ; **Fig 3c**), suggesting again that the impact that Ndt80 has is more  
292 significant in the absence of Tel1. As expected from the highly correlated Pearson values, at  
293 broad scale, hotspot-strength distributions were visually almost indistinguishable between the  
294 four datasets when plotted along a representative chromosome (chromosome VII; **Fig 3d**).  
295 However, plotting a smoothed ratio of hotspot strength revealed spatial patterns influenced by  
296 the presence of Ndt80 that were much stronger in the absence of Tel1 (**Fig 3e**; **Fig S6**).

297  
298 To characterise these effects on each chromosome, ratios of hotspot strengths  $\pm NDT80$  were  
299 represented as heatmaps binned at 50 kb scale (**Fig 3f-g**), and plotted centred on the  
300 centromere consistent with prior representations<sup>83</sup>. Effects of Ndt80 in the presence of Tel1  
301 were relatively modest and did not display a clear spatial pattern with respect to chromosome  
302 features such as telomeres and the centromere (**Fig 3f**). By contrast, in the absence of Tel1,  
303 the presence of Ndt80 led to a dramatic enrichment of Spo11-DSB signal in centromere-  
304 proximal regions—notably encompassing the entirety of the three shortest chromosomes (I,  
305 III, and VI), and the entire region of chromosome XII left of the rDNA array (**Fig 3g**). These  
306 observations suggest that *NDT80* deletion in the *tel1* $\Delta$  background promotes genome-wide  
307 redistribution of Spo11 activity, generating a more uniform pattern—and preventing bulk  
308 enrichment of Spo11 activity in these largely centromere-proximal regions.

309  
310 To understand how this pattern of enrichment might be explained by other features of Spo11-  
311 DSB formation, we compared our fold ratios  $\pm NDT80$  in the *tel1* $\Delta$  background to the time that  
312 Rec114—an essential pro-DSB factor—associates with meiotic chromosomes<sup>83</sup> (**Fig 3h**).  
313 Remarkably, regions of Spo11-DSB formation that are enriched in the *sae2* $\Delta$  *tel1* $\Delta$  strain are  
314 similar to regions that load Rec114 early (**Fig 3g-h**). Given that Rec114 is essential for Spo11-  
315 DSB formation<sup>3,12,20,21,84,85</sup>, we propose that in the shorter prophase experienced by *sae2* $\Delta$   
316 *tel1* $\Delta$  cells (data above), DSB formation is enhanced in the subset of chromosome domains in  
317 which Rec114 first associates. We further propose that it is this effect that drives the negative  
318 DSB interference (DSB clustering) that we have measured over short distances<sup>56</sup>.

### 319 320 **Tel1 activity patterns DSB hotspot strength across the genome**

321 We thus next sought to take advantage of the *NDT80* deletion-induced meiotic prophase arrest  
322 to characterise the specific genome-wide effects caused by loss of Tel1-dependent DSB  
323 interference (**Fig 4**). Previous analysis of Spo11-oligo patterns in the presence and absence  
324 of Tel1 revealed spatially localised correlated changes in DSB hotspot strengths that decayed  
325 with distance (adjacent hotspots either went up or down in a correlated manner), with local  
326 inhibition also patterned locally by the insertion of strong DSB hotspots<sup>60</sup>. Globally, however,  
327 DSB hotspot strengths measured using Spo11-oligo data in the presence and absence of Tel1

328 are highly correlated ( $R=0.97$ ; **Fig 4a**), suggesting relatively weak global effects. By contrast,  
329 deletion of *TEL1* affected CC-seq (*sae2Δ* background) hotspot strengths more severely  
330 ( $R=0.91$  in *NDT80+*; **Fig 4b**), likely driven at least in part by the *tel1Δ*-dependent alterations in  
331 prophase length described above. Nevertheless, even in the absence of Ndt80, CC-seq DSB  
332 hotspot strengths  $\pm TEL1$  were less similar in the CC-seq *sae2Δ* data ( $R=0.94$  in *ndt80Δ*; **Fig**  
333 **4c**) than in the published Spo11-oligo data<sup>60</sup>.

334

335 It is important to note that in all cases, these Pearson correlation values are high, and  
336 consistent with this, like with  $\pm NDT80$  comparisons, broad-scale hotspot-strength distributions  
337 were almost visually indistinguishable from one another between the paired  $\pm TEL1$  dataset  
338 comparisons when plotting along a representative chromosome (e.g. chromosome IV; **Fig 4d**).  
339 However, plotting a smoothed ratio of hotspot strengths revealed a very different picture (**Fig**  
340 **4e**; **Fig S7a**). Whereas effects on Spo11-oligo hotspot strength  $\pm TEL1$  were relatively weak  
341 and evenly distributed (**Fig 4e**, top panel; **Fig S7a**, left column) deletion of *TEL1* in the CC-  
342 seq *sae2Δ* and *sae2Δ ndt80Δ* strains revealed strong Tel1-dependent spatially patterned  
343 chromosome-specific changes that shared many similar features in both the presence and  
344 absence of Ndt80 (**Fig 4e**, middle and lower panels; **Fig S7a**, middle and right columns; **Fig**  
345 **S7b**). The most dramatic effects were often observed towards the ends of many  
346 chromosomes—where the distribution of DSBs was enhanced in the presence of Tel1, as was  
347 the relative proportion of DSBs forming on the entirety of chromosome 12 (**Fig 4f-g**).

348

349 We propose that these chromosome-specific effects are the genome-wide signature of Tel1-  
350 dependent DSB interference—manifesting as spatially patterned changes in the population-  
351 average frequency of Spo11 DSB formation within hotspots (LLR and MJN; manuscript in  
352 preparation). Importantly, although such effects are influenced to some degree by prophase  
353 timing, they are in fact largely unaltered by changes in the length of meiotic prophase.

354

## 355 **DISCUSSION**

356 We previously established in *S. cerevisiae* that Spo11-DSBs are subject to distance-  
357 dependent interference via activation of the DNA-damage-responsive kinase, Tel1—part of a  
358 negative-regulatory pathway that appears to be conserved in mice, flies and plants<sup>63–68</sup>.  
359 Critically, due to its involvement in the DNA damage response, Tel1 has at least two  
360 overlapping roles: DSB interference and regulation of meiotic prophase kinetics, but our  
361 understanding of how these two roles intersected was unclear and largely unexplored.

362

363 To investigate the relationship between these two roles of Tel1, we have measured the  
364 frequency of single and coincident Spo11-DSB formation arising at adjacent hotspots in the

365 presence and absence of both Tel1 and Ndt80, the latter of which is a critical transcription  
366 factor required for exit from meiotic prophase<sup>81</sup>. Importantly, deletion of *NDT80* causes cells  
367 to arrest in late meiotic prophase irrespective of the strength of checkpoint activation. In order  
368 to estimate total Spo11-DSB formation potential, we have utilised strains in which Mre11-  
369 dependent nucleolytic processing of Spo11-capped DSB ends is abolished via deletion of the  
370 activator, *SAE2*<sup>29,31</sup>, permitting total Spo11-DSB levels to accumulate.

371  
372 When considering total Spo11-DSB levels, both *TEL1* and *NDT80* deletion independently  
373 increased Spo11 activity, with the greatest DSB frequency arising when both genes were  
374 deleted (**Fig 1f-h; Fig S2d-f; Fig S3d-f**). Similar estimates of global Spo11-DSB formation in  
375 the presence and absence of Tel1 or Ndt80, but in the presence of Sae2, revealed increases  
376 similar to those reported here<sup>60,77</sup>. However, the epistatic relationship between Tel1 and Ndt80  
377 has not been explored. Our observations suggest that Tel1 and Ndt80 likely independently  
378 limit total Spo11-DSB levels due to their separate roles in DSB interference and regulation of  
379 prophase exit, as has been discussed<sup>59,60</sup>.

380  
381 Because total DSB signals accumulate, deletion of *SAE2* also permits the analysis of  
382 instances where DSBs arise coincidentally on the same DNA molecule: “inter-hotspot double  
383 cuts”. Whilst both *TEL1* and *NDT80* deletion appear, on average, to increase total DSB  
384 formation (see above), and lead to increases in the coincidence of DSB formation in hotspots  
385 that were relatively distant to one another (medium range; 20-50 kb), the same was not the  
386 case for hotspots at close range (<15 kb). Instead, short-range suppression of double cutting  
387 largely depends only on Tel1, with modest or negligible increases upon *NDT80* deletion (**Fig**  
388 **1k; Fig S2i,j; Fig S3h,i**).

389  
390 Intriguingly, in our prior work, although we clearly demonstrated Tel1-dependent DSB  
391 inhibition, over very short inter-hotspot distances interference was not detected in the  
392 presence of Tel1<sup>56</sup>. Moreover, when *TEL1* was deleted, coincidence of Spo11-DSB formation  
393 in adjacent hotspots was higher-than-expected<sup>56</sup>.

394  
395 We previously proposed that these effects can arise due to localised activation of  
396 chromosomal domains—priming them for Spo11-DSB formation in different locations in each  
397 cell<sup>56</sup>. For instance, although there are around ~4000 potential Spo11-DSB hotspots spread  
398 across the haploid yeast genome (totalling 16000 in the replicated diploid prophase state),  
399 only 100-200 DSBs are catalysed in any given cell (2-4 DSBs per Mbp), thus some aspect(s)  
400 of Spo11-DSB formation must be rate-limiting. If it is the activation step that limits total DSB  
401 potential, then the frequency of active domains must be limiting, meaning therefore that active

402 domains vary in their chromosomal location across the cell population. These effects will  
403 create a heterogeneous mixture of active and inactive subpopulations when considering any  
404 given chromosomal region (**Fig 5a**). Critically, such heterogeneity will give rise to lower-than-  
405 expected measurements of DSB interference (**Fig 5a**, bottom).

406  
407 In wild-type cells, the formation of such subdomains is likely to help disperse a limited amount  
408 of DSB potential across the genome. However, in *tel1Δ*, the absence of localised negative  
409 regulation will permit efficient coincident cutting by Spo11 at all DSB hotspots located within  
410 any local region of activation—detected as negative interference<sup>56</sup> (**Fig 5a**, bottom).

411  
412 A prediction of the subpopulation explanation is that any process that increases the  
413 homogeneity of the cell population will reduce any underestimates of interference strength (i.e.  
414 reduce skews towards negativity). Remarkably, here we have established that underestimates  
415 of interference strength are abolished upon deletion of *NDT80*—suggesting that the  
416 subpopulations inferred to arise in *NDT80+* cells are caused by the limited time window that  
417 cells spend within meiotic prophase.

418  
419 Furthermore, because of the dual role of Tel1 in both DSB interference and checkpoint  
420 activation, loss of Tel1 leads to an accelerated exit from meiotic prophase (**Fig 1b**),  
421 presumably due to a relatively earlier activation of Ndt80 and subsequent down-regulation of  
422 Spo11-DSB formation<sup>59</sup>. Such effects of Tel1 loss are likely to be more significant in the *sae2Δ*  
423 background, where DSB-dependent checkpoint activation is dependent on Tel1<sup>70</sup>, which is not  
424 the case under conditions where Spo11 has been removed from DSB ends and ssDNA  
425 resection has initiated<sup>60,70</sup>. Thus, the differential prophase timing that arises  $\pm$ *TEL1* in the  
426 *sae2Δ* background potentially exacerbates the subpopulation effect. Our observations suggest  
427 that by extending the length of prophase, *NDT80* deletion can be used to limit effects caused  
428 by differential prophase kinetics, homogenizing the DSB potential across the entire genome  
429 and cell population (**Fig 5b**). We contend that this is particularly important when deleting *TEL1*,  
430 or other factors, that influence the meiotic prophase checkpoint.

431  
432 A key feature of our observations is that negative interference (and its abolition upon *NDT80*  
433 deletion) was only detected over short distances—behaviour that is consistent with zones of  
434 activation being of relatively limited size (<15 kb). Although Spo11-DSB formation arises in  
435 the context of a maturing loop-axis chromosome structure organised by cohesins<sup>86</sup>, and  
436 contains chromatin loops that are within this size range in *S. cerevisiae*<sup>87,88</sup>, such active  
437 domains may simply coincide with, and co-occur alongside loop formation, but not necessarily  
438 depend upon their existence (see pro-DSB section below).

439

440 We have also explored the changes in genome-wide patterns of Spo11-DSB formation that  
441 arise in the presence and absence of Tel1, and how these differences are affected by *NDT80*  
442 deletion (**Fig 3**). Importantly—and consistent with our hypothesis that accelerated exit from  
443 prophase in *sae2Δ tel1Δ* accentuates the impact of subpopulation domains in which Spo11 is  
444 active—deletion of *NDT80* led to a much stronger change in the genome-wide pattern of DSB  
445 formation in *sae2Δ tel1Δ* cells than in *sae2Δ* cells (**Fig 3f-g**). Such a difference is expected  
446 due to the more limited temporal window of meiotic prophase that otherwise arises in the  
447 absence of Tel1.

448

449 Critically, regions where Spo11-DSB activity is greatest in the presence of Ndt80 visually  
450 correlate with regions that load Rec114 and Mer2 early in meiosis<sup>83</sup> (**Fig 3g-h**), arguing that  
451 when the temporal window of meiotic prophase is limited, DSBs tend to arise more often in  
452 those regions that load pro-DSB components more efficiently. By contrast, when the duration  
453 of meiotic prophase is extended (by *NDT80* deletion), DSBs now arise more evenly across  
454 the genome—with a disproportionate enhancement in regions that load pro-DSB factors late.

455

456 In general terms, we propose that it is the disproportionate loading of pro-DSB factors in some  
457 genomic regions that drives the negative DSB interference (DSB clustering) detected over  
458 short distances upon *TEL1* deletion<sup>56</sup>. Precisely how Rec114, Mer2 and Mei4 regulate Spo11-  
459 DSB formation remains to be elucidated, however, their potential to form limited amounts<sup>20,21,89</sup>  
460 of intermolecular condensates<sup>22</sup>, which may generate a surface for Spo11-DSB formation<sup>22,41</sup>,  
461 makes them prime candidates for generating chromosome-associated domains of local  
462 Spo11-DSB potential.

463

464 A second finding that emerges from our genome-wide studies, is that despite the influence  
465 that temporal changes in meiotic prophase timing has on Spo11-DSB distribution, deletion of  
466 *TEL1* itself elicits a much stronger effect that is detectable both in the presence and absence  
467 of Ndt80 (**Fig 4f-g**). We hypothesise that these strong Tel1-dependent changes are the  
468 genome-wide consequence of DSB interference (LLR & MJN, in preparation), and are robust  
469 to changes in the length of meiotic prophase.

470

471 A feature—but also a limitation—of our analytical methods is the reliance on *SAE2* deletion to  
472 permit Spo11-DSB and Spo11 double-cut signals to accumulate without repair. On the one  
473 hand, *sae2Δ* enables us to study mechanisms of DSB interference in the absence of other  
474 regulatory pathways that are dependent upon and triggered after Spo11 removal (i.e.  
475 homologue engagement<sup>77,90</sup>), and which may otherwise obscure Tel1's influence. However,

476 we cannot exclude that the accumulation of unrepaired Spo11 DSBs itself influences how the  
477 system behaves, and as such, all observations must be interpreted with this in mind.

478  
479 Looking more broadly, the regulatory feedback mechanisms discussed here are likely to  
480 ensure that cells stay in a DSB-permissive state only for as long as needed—limiting the level  
481 of DSB formation, and therefore recombination, required to facilitate accurate chromosome  
482 pairing and, by extension, efficient chromosome segregation without risk of aneuploidy.  
483 Because of Ndt80's role as a transcription factor we favour that the effect Ndt80 elicits is  
484 global, influencing the length of time any individual cell remains in meiotic prophase. However,  
485 it is also possible that targets of Ndt80 act locally to suppress and inhibit Spo11 activity, directly  
486 creating heterogeneity in which chromosomal regions are active within individual cells.  
487 Regardless of mechanism, our observations highlight how restrictions on global Spo11 activity  
488 can generate subdomains of concerted activity—influencing both localised and population-  
489 average patterns of genetic recombination.

490

#### 491 **AUTHOR CONTRIBUTIONS**

492 LLR and MJN devised the study, analysed and interpreted the observations, and wrote the  
493 paper. LLR prepared the figures and performed the experiments with additional contributions  
494 from DJ, GB and RMA. WHG and GB contributed to the development of analytical tools.

495

#### 496 **ACKNOWLEDGEMENTS**

497 We thank S. Keeney, J. Carballo and M. Lichten for sharing *S. cerevisiae* strains containing  
498 relevant constructs (*spo11-Y135F::KanMX*, *tel1Δ::hphNT2* and *sae2Δ::kanMX6*, respectively),  
499 and K. Caldecott and A. Oliver for sharing recombinant TDP2. LLR, MJN, DJ, WHG, GB, RMA  
500 were supported by an ERC Consolidator Grant (311336), the BBSRC (BB/M010279/1), the  
501 Wellcome Trust (200843/Z/16/Z), and a Career Development Award from the Human Frontier  
502 Science Program (CDA00060/2010). WHG is currently supported by a BBSRC Discovery  
503 Fellowship (BB/V005081/1).

504

#### 505 **DATA ACCESSIBILITY**

506 Raw libraries are available from the GEO repository under accession number (pending).  
507 Processed hotspot average table files and analysis scripts are available at  
508 [https://github.com/Neale-Lab/Ndt80\\_LLR](https://github.com/Neale-Lab/Ndt80_LLR).

509

510

## 511 MATERIAL AND METHODS

### 512 Yeast strains

513 All the *Saccharomyces cerevisiae* yeast strains used in this study are in the SK1 background  
514 as described in **Table S1**, and derived using standard techniques. Strains contained the  
515 *his4X::LEU2* and *leu2::hisG* exogenous sequences inserted on chromosome III<sup>39,41</sup>, and  
516 carried the *ndt80Δ::LEU2*, *tel1Δ::HphMX4* and/or *sae2Δ::kanMX* gene disruption  
517 alleles<sup>56,74,81,91</sup>. The *spo11-Y135F::KanMX* allele contains an inactivating mutation of the  
518 catalytic tyrosine residue<sup>16</sup>.

519

### 520 Culture methods

521 For meiosis induction, a single colony was inoculated in 4mL of YPD medium (1% yeast  
522 extract, 2% peptone, 2% glucose supplemented with 0.5 mM adenine and 0.4 mM uracil) and  
523 incubated at 30 °C, 250 rpm for a day to reach saturation, then diluted to OD600 of 0.2 in a  
524 volume of 200 mL of either YPA (1% yeast extract, 2% peptone, 1% potassium acetate) or  
525 SPS (0.5% yeast extract, 1% peptone, 0.67% Yeast Nitrogen Base without amino acids, 1%  
526 potassium acetate, 0.05M Potassium Hydrogen phthalate, 0.001% Antifoam 204) pre-  
527 sporulation medium. Cultures were incubated at 30 °C, 250 rpm for 14–16 hours, then washed  
528 and resuspended in 200 mL pre-warmed SPM sporulation medium (2% potassium acetate  
529 supplemented with diluted amino acids) and incubated at 30°C, 250rpm for the duration of the  
530 time course. Samples were taken at the relevant timepoints and processed differently. For  
531 DNA extraction, 20 mL of culture was taken at t = 0, 4, 6 and 8 hours after inducing meiosis.  
532 Samples were centrifuged at 3000 x g for 4 minutes, supernatant was discarded and pellet  
533 resuspended in 2 mL 50 mM EDTA, centrifuged again for 1 minute at 3000 x g, supernatant  
534 discarded and pellet stored at -20 °C until use. For Spo11 CC-seq, 50 mL of culture was taken  
535 at t = 6 hours. Samples were centrifuged at 3000 x g for 5 minutes, supernatant discarded and  
536 pellet frozen at -20 °C until use. For FACS, 200 uL of culture was taken at t = 0, 2, 4, 6 and 8  
537 hours after inducing meiosis, samples were centrifuged at 16,000 x g for 1 minute, supernatant  
538 discarded, fixed in 1mL of 70% EtOH and stored at 4 °C until use. For DAPI staining, 195 uL  
539 of culture was taken at t = 3, 4, 5, 5.5, 6, 7, 8, 9 and 10 hours after inducing meiosis. Cells  
540 were fixed in 450 uL of 100% EtOH and stored at -20 °C until use.

541

### 542 FACS

543 Samples were centrifuged at room temperature, 16,000 x g for 1 minute. Supernatant was  
544 aspirated, pellet resuspended in 500 uL 10 mM Tris HCl pH 8.0 / 15 mM NaCl / 10 mM EDTA  
545 pH 8.0 / 1 mg/mL RNase A and incubated at 37°C for 2 hours at 800 rpm on a Eppendorf  
546 Thermomixer. Samples were then centrifuged at 16,000 x g for 1 minute, supernatant  
547 aspirated, pellets resuspended in 100 uL of 1 mg/mL Proteinase K + 50 mM Tris HCl pH 8.0

548 and incubated at 50°C for 30 minutes at 800 rpm on a Eppendorf Thermomixer. Samples were  
549 centrifuged and supernatant aspirated. Pellets were washed in 1 mL 1M Tris-HCl pH 8.0 and  
550 then resuspended in 1 mL 50 mM Tris-HCl pH 8.0 + 1 uM Sytox green. Samples were stored  
551 overnight at 4 °C and then sonicated at 20% amplitude for 12–14 seconds before being sorted  
552 by flow cytometry (Accuri™ Flow Cytometers).

553

### 554 **Cell fixation and DAPI staining**

555 Ethanol-fixed cells (4 µL) were dried at RT on a glass slide, stained with 2 µL of Fluoroshield  
556 ™ DAPI Sigma-Aldrich (F6057-20ML) and 100–200 mono-, bi-, tri-, tetra-nucleate cells were  
557 scored by microscopy (Zeiss AXIO) using fluorescence (CoolLED pE-300 lite). Meiotic  
558 progression was determined based on the frequency of cells that entered MI (binucleated) or  
559 MII (tri-, tetra-nucleate) at different timepoints after inducing meiosis.

560

### 561 **Proteolytic gDNA extraction**

562 Meiotic cell culture pellets were defrosted at room temperature, resuspended in 500 uL of  
563 spheroplasting mix: 492.5 uL of spheroplasting buffer (1 M sorbitol / 100 mM NaHPO<sub>4</sub> pH 7.2  
564 / 100 mM EDTA), 2.5 uL of zymolyase 100T (50 mg/mL) and 5 uL of β-mercaptoethanol, and  
565 incubated at 37 °C for 1 hour. Cells were lysed by adding 100 uL of 3% SDS / 0.1 M EDTA  
566 plus 5 uL of Proteinase K (50 mg/mL), and incubated overnight at 60 °C. After cooling to room  
567 temperature, proteins were removed with 500 uL of phenol/chloroform: two rounds of vigorous  
568 shaking separated by a 5-minute rest and followed by a 5 minutes centrifugation at 14,000  
569 rpm. DNA and RNA were extracted from 450 uL of the aqueous phase and precipitated with  
570 45 uL of 3 M NaAc pH 5.2 and 500 uL of 100% EtOH, centrifuged at 14,000 rpm for 1 minute,  
571 aspirated and washed with 1 mL 70% EtOH, pulsed down, air dried for 10 minutes and  
572 resuspended in 450 uL of 1x TE (10 mM Tris / 1 mM EDTA pH 7.5) overnight at 4 °C. RNA  
573 was digested with 50 uL of 1 mg/mL RNase A (10 mg/ml stock) for 1 hour at 37 °C. DNA was  
574 precipitated by addition of 50 uL of NaAc pH 5.2 and 1 mL of 100% EtOH, mixed by inversion  
575 and centrifuged for 1 min at 14,000 rpm. DNA was washed with 1 mL 70% EtOH, pulsed down,  
576 air dried for 10 minutes, dissolved in 200 uL of 1x TE (10 mM Tris / 1 mM EDTA pH 7.5 prep  
577 room solution) overnight at 4 °C. To measure the frequency of DSBs (single-cuts) gDNA was  
578 digested with a restriction enzyme (as described in [Table S2](#), digestion column). For 20 uL of  
579 gDNA, 6 uL of H<sub>2</sub>O, 3 uL of enzyme buffer and 1 uL of enzyme was added and incubated  
580 overnight at 37 °C. To quantify double DSB events (double-cuts), gDNA was left undigested  
581 ([Table S2](#)).

582

583

584



### 585 **DSB analysis by Southern blot**

586 0.7% or 0.8% agarose gels were prepared for digested and undigested gDNA samples,  
587 respectively. The gel was mixed with 125  $\mu$ L EtBr (0.1 mg/mL) and allowed to set for 1 hour  
588 at room temperature. 20  $\mu$ L of digested sample + 1x loading dye or 10  $\mu$ L of gDNA + 10  $\mu$ L  
589 water and 1x loading dye was loaded on wells. For the ladder, 10  $\mu$ L of Lambda BstE II-digest  
590 was used as ladder. DNA was separated at 45–50 V for 15–19 hours. Gels were imaged using  
591 the Syngene InGenius bioimaging system. DNA was nicked by exposure to 1800 J/m<sup>2</sup> UV in  
592 a Stratalinker. Afterwards, the gel was soaked in denaturing solution (0.5 M NaOH, 1.5 M  
593 NaCl), on a shaker for ~30 minutes.

594

### 595 **DSB analysis by PFGE**

596 DNA was embedded in agarose plugs as described below. Agarose plug preparation: Cell  
597 pellets were defrosted at room temperature and washed twice with 50 mM cold EDTA  
598 (resuspended, spun 1 minute at 4 °C 3000 x g and aspirated). Cells were then resuspended  
599 with 135  $\mu$ L of solution 1 (50 mM EDTA + SCE [Filtered 1 M sorbitol, 0.1 M sodium citrate,  
600 0.06 M EDTA pH 7] + 2% BME + 1 mg/mL zymolyase 100T) and 165  $\mu$ L of pre-warmed 1%  
601 LMP agarose (1% agarose in 0.125M EDTA) at 55 °C. The mix was cooled down at 4 °C for  
602 30 minutes. The solidified plugs were added onto 1 mL of solution 2 (0.45 M EDTA + 20 mM  
603 Tris-HCl pH 8 + 1% BME + RNase 10  $\mu$ g/mL + water) and incubated for 2 hours at 37 °C.  
604 Samples were inverted every 30 minutes. Solution 2 was aspirated, and plugs were covered  
605 with 1 mL of solution 3 (0.25 M EDTA + 20 mM Tris-HCl pH 8 + 1% sodium sarcosine + 1  
606 mg/mL proteinase K + water) and incubated overnight at 55 °C. Solution 3 was aspirated and  
607 samples washed three times with 1 mL of 50 mM EDTA on a rotary wheel. EDTA was  
608 aspirated and plugs were covered by 1 mL of storage buffer (50 mM EDTA, 50% glycerol) and  
609 stored at -20°C until use. PFGE gel: 1.3% agarose gel was prepared using 150 mL of 0.5X  
610 TBE (diluted from 5X TBE: 450 mM tris base + 450 mM boric acid + 10 mM EDTA pH8 +  
611 water) and cooled down to 55 °C before use. The plugs were cut in half and washed in 2.5 mL  
612 of 0.5X TBE on the rotary wheel for 15 minutes. The plugs were loaded in order onto the gel  
613 comb and fixed with 1% agarose. A slice of mid-range PFG marker (#3425, NEB) was fixed  
614 onto the first and last gel combs. Once set (10 min at room temperature), the 1.3% agarose  
615 was poured covering the gel combs and allowed to solidify for 30 minutes. The gel comb was  
616 removed, and wells filled with 1% agarose and allowed to set (10 min at room temperature),  
617 then immersed into pre-cooled 0.5X TBE buffer for 15 minutes. For DNA fragments of ~150  
618 kb, the gel was run 30–30s for 3 hours + 3–6s for 37 hours at 6 V/cm and 120 °C angle. After  
619 electrophoresis, the gel was soaked in 150 mL distilled water + 7.5  $\mu$ L of EtBr (0.1 mg/mL),  
620 shaken for 20 minutes and then imaged using the Syngene InGenius bioimaging system. DNA

621 was nicked by exposure to 1800 J/m<sup>2</sup> UV in a Stratalinker, then soaked in a denaturing  
622 solution (0.5 M NaOH, 1.5 M NaCl) whilst shaking for ~30 minutes.

623

### 624 **Southern blotting transfer and hybridisation**

625 The denatured gels were transferred to a Biorad Zeta-probe membrane under vacuum (50–  
626 55 mBar for ~2 hours) in 0.5 M NaOH, 1.5 M NaCl. The membrane was washed twice with 2x  
627 SSC (diluted from 20x: 3M Sodium chloride, 0.3 M trisodium citrate pH 7.0) and then thrice  
628 with distilled water. The membrane was cross-linked by exposure to 1200 J/m<sup>2</sup> UV in a  
629 Stratalinker, dried at room temperature for 1 hour and stored at 4 °C until probed. Southern  
630 Blot membranes were incubated with 35 mL of a pre-warmed hybridisation solution (0.5 M  
631 NaHPO<sub>4</sub> pH 7.5, 5% SDS, 1 mM EDTA, 1% BSA) at 65 °C for ~1–2 hours. To quantify the  
632 single and double DSBs, the membranes were hybridised with an appropriate DNA probe—  
633 as indicated in figure legends and **Table S2**—radiolabelled with P<sub>32</sub> prepared via random  
634 priming using the High Prime kit (BioRad). Pre-hybridisation solution was discarded, and the  
635 membrane incubated with 20 mL of hybridisation solution containing the radioactive probe  
636 overnight at 65 °C. After incubation, the membrane was washed (10% SDS / 1M NaHPO<sub>4</sub> /  
637 0.5 M EDTA), air dried, and exposed to a phosphor screen overnight. After exposure (usually  
638 8–48 hours), the phosphoscreen was scanned with a Fuji FLA 5000 reader and analysed using  
639 ImageGauge software (Fuji). DSB and DC quantification methods, and limitations of the  
640 technique are described in **Extended Methods**.

641

### 642 **Covalent complex sequencing (CC-seq) mapping**

643 Protein-DNA Covalent-Complex Mapping (CC-seq) in yeast followed a method previously  
644 described<sup>37</sup>. Briefly, meiotic cell samples are chilled and frozen at -20°C for at least 8 hours,  
645 then thawed and spheroplasted (in 1 M sorbitol, 50 mM NaHPO<sub>4</sub>, 10 mM EDTA, 30 min at  
646 37°C), fixed in 70% ice-cold ethanol, collected by centrifugation, dried briefly, then lysed in  
647 STE (2% SDS, 0.5 M Tris, 10 mM EDTA). Genomic DNA was extracted via  
648 Phenol/Chloroform/IAA extraction (25:24:1 ratio) at room temperature, with aqueous material  
649 carefully collected, precipitated with ethanol, washed, dried, then resuspended in 1xTE buffer  
650 (10 mM Tris/1 mM EDTA). Total genomic DNA was sonicated to <500 bp average length using  
651 a Covaris M220 before equilibrating to a final concentration of 0.3 M NaCl, 0.1% TritonX100,  
652 0.05% Sarkosyl. Covalent complexes were enriched on silica columns (Qiagen) via  
653 centrifugation, washed with TEN solution (10 mM Tris / 1 mM EDTA / 0.3 M NaCl), before  
654 eluted with TES buffer (10 mM Tris / 1 mM EDTA / 1% SDS). Samples were treated with  
655 Proteinase K at 50°C, and purified by ethanol precipitation. DNA ends were filled and repaired  
656 using NEB Ultra II end-repair module (NEB #E7645), with adapters ligated sequentially to the  
657 sonicated, then blocked, ends with recombinant TDP2 treatment in between these steps to

658 remove the 5-phosphotyrosyl-linked Spo11 peptide. Ampure bead cleanups were used to  
659 facilitate sequential reactions. PCR-amplified libraries were quantified on a Bioanalyser and  
660 appropriately diluted and multiplexed for deep sequencing (Illumina MiSeq 2x75 bp).

661  
662 FASTQ reads were aligned to the reference genome (SacCer3H4L2; which includes the  
663 *HIS4::LEU2* and *leu2::hisG* loci inserted into the Cer3 *S. cerevisiae* genome build<sup>39,41</sup>) via  
664 Bowtie2, using TermMapper as previously described<sup>39,41</sup> ([https://github.com/Neale-](https://github.com/Neale-Lab/terminalMapper)  
665 **Lab/terminalMapper**), with all subsequent analyses performed in R version 4.1.2 using  
666 RStudio (Version 2021.09.0 Build 351). Reproducibility between libraries for independent  
667 biological replicates was evaluated and validated prior to averaging. For detailed information  
668 see **Supplementary scripts**. Details of individual libraries are presented in **Table S3**.

669

### 670 **Calibration of CC-seq libraries**

671 For each library the proportion of non-specific reads (background reads) were estimated by  
672 measuring the hit rate per million reads per base pair (HpM) in 47 of the longest gene ORFs  
673 (> 5.5 kb long) in the *S. cerevisiae* genome. For detailed information about the mechanics of  
674 the script, see Calculating background reads.R in [https://github.com/Neale-](https://github.com/Neale-Lab/Ndt80_LLR)  
675 **Lab/Ndt80\_LLR**.

676

### 677 **Bioinformatic analysis of Spo11-DSB**

678 All bioinformatics analyses were performed in R (R version 4.1.2) using RStudio (Version  
679 2021.09.0 Build 351). Scripts are available on [https://github.com/Neale-Lab/Ndt80\\_LLR](https://github.com/Neale-Lab/Ndt80_LLR).  
680 For further information see **Script summary description**.

681

## 682 **REFERENCES**

- 683 1. Bergerat, A. et al. An atypical topoisomerase II from Archaea with implications for meiotic  
684 recombination. *Nature* **386**, 414-417 (1997).
- 685 2. Keeney, S., Giroux, C. N. & Kleckner, N. Meiosis-specific DNA double-strand breaks are  
686 catalyzed by Spo11, a member of a widely conserved protein family. *Cell* **88**, 375-384 (1997).
- 687 3. Keeney, S. Spo11 and the Formation of DNA Double-Strand Breaks in Meiosis. *Genome*  
688 *dynamics and stability* **2**, 81 (2008).
- 689 4. Hunter, N. Meiotic Recombination: The Essence of Heredity. *Cold Spring Harb Perspect Biol* **7**,  
690 (2015).
- 691 5. Zickler, D. & Kleckner, N. Recombination, Pairing, and Synapsis of Homologs during Meiosis.  
692 *Cold Spring Harb Perspect Biol* **7**, (2015).
- 693 6. Page, S. L. & Hawley, R. S. Chromosome choreography: the meiotic ballet. *Science* **301**, 785-  
694 789 (2003).
- 695 7. Petronczki, M., Siomos, M. F. & Nasmyth, K. Un menage a quatre: the molecular biology of  
696 chromosome segregation in meiosis. *Cell* **112**, 423-440 (2003).
- 697 8. Cooper, T. J., Wardell, K., Garcia, V. & Neale, M. J. Homeostatic regulation of meiotic DSB  
698 formation by ATM/ATR. *Exp Cell Res* **329**, 124-131 (2014).
- 699 9. Keeney, S., Lange, J. & Mohibullah, N. Self-organization of meiotic recombination initiation:  
700 general principles and molecular pathways. *Annu Rev Genet* **48**, 187-214 (2014).

- 701 10. Cooper, T. J., Garcia, V. & Neale, M. J. Meiotic DSB patterning: A multifaceted process. *Cell*  
702 *Cycle* **15**, 13-21 (2016).
- 703 11. Yadav, V. K. & Claeys Bouuaert, C. Mechanism and Control of Meiotic DNA Double-Strand  
704 Break Formation in *S. cerevisiae*. *Front Cell Dev Biol* **9**, 642737 (2021).
- 705 12. Keeney, S. Mechanism and control of meiotic recombination initiation. *Curr Top Dev Biol* **52**, 1-  
706 53 (2001).
- 707 13. Arora, C., Kee, K., Maleki, S. & Keeney, S. Antiviral protein Ski8 is a direct partner of Spo11 in  
708 meiotic DNA break formation, independent of its cytoplasmic role in RNA metabolism. *Mol Cell*  
709 **13**, 549-559 (2004).
- 710 14. Claeys Bouuaert, C. et al. Structural and functional characterization of the Spo11 core complex.  
711 *Nat Struct Mol Biol* **28**, 92-102 (2021).
- 712 15. Nichols, M. D., DeAngelis, K., Keck, J. L. & Berger, J. M. Structure and function of an archaeal  
713 topoisomerase VI subunit with homology to the meiotic recombination factor Spo11. *EMBO J*  
714 **18**, 6177-6188 (1999).
- 715 16. Diaz, R. L., Alcid, A. D., Berger, J. M. & Keeney, S. Identification of residues in yeast Spo11p  
716 critical for meiotic DNA double-strand break formation. *Mol Cell Biol* **22**, 1106-1115 (2002).
- 717 17. Vrielynck, N. et al. A DNA topoisomerase VI-like complex initiates meiotic recombination.  
718 *Science* **351**, 939-943 (2016).
- 719 18. Robert, T. et al. The TopoVIB-Like protein family is required for meiotic DNA double-strand  
720 break formation. *Science* **351**, 943-949 (2016).
- 721 19. Panizza, S. et al. Spo11-accessory proteins link double-strand break sites to the chromosome  
722 axis in early meiotic recombination. *Cell* **146**, 372-383 (2011).
- 723 20. Li, J., Hooker, G. W. & Roeder, G. S. *Saccharomyces cerevisiae* Mer2, Mei4 and Rec114 form  
724 a complex required for meiotic double-strand break formation. *Genetics* **173**, 1969-1981 (2006).
- 725 21. Maleki, S., Neale, M. J., Arora, C., Henderson, K. A. & Keeney, S. Interactions between Mei4,  
726 Rec114, and other proteins required for meiotic DNA double-strand break formation in  
727 *Saccharomyces cerevisiae*. *Chromosoma* **116**, 471-486 (2007).
- 728 22. Claeys Bouuaert, C. et al. DNA-driven condensation assembles the meiotic DNA break  
729 machinery. *Nature* **592**, 144-149 (2021).
- 730 23. Stracker, T. H. & Petrini, J. H. J. The MRE11 complex: starting from the ends. *Nat Rev Mol Cell*  
731 *Biol* **12**, 90-103 (2011).
- 732 24. Neale, M. J., Pan, J. & Keeney, S. Endonucleolytic processing of covalent protein-linked DNA  
733 double-strand breaks. *Nature* **436**, 1053-1057 (2005).
- 734 25. Cannavo, E. & Cejka, P. Sae2 promotes dsDNA endonuclease activity within Mre11-Rad50-  
735 Xrs2 to resect DNA breaks. *Nature* **514**, 122-125 (2014).
- 736 26. Cannavo, E. et al. Regulatory control of DNA end resection by Sae2 phosphorylation. *Nat*  
737 *Commun* **9**, 4016 (2018).
- 738 27. Cartagena-Lirola, H., Guerini, I., Viscardi, V., Lucchini, G. & Longhese, M. P. Budding Yeast  
739 Sae2 is an In Vivo Target of the Mec1 and Tel1 Checkpoint Kinases During Meiosis. *Cell Cycle*  
740 **5**, 1549-1559 (2006).
- 741 28. Milman, N., Higuchi, E. & Smith, G. R. Meiotic DNA double-strand break repair requires two  
742 nucleases, MRN and Ctp1, to produce a single size class of Rec12 (Spo11)-oligonucleotide  
743 complexes. *Mol Cell Biol* **29**, 5998-6005 (2009).
- 744 29. Keeney, S. & Kleckner, N. Covalent protein-DNA complexes at the 5' strand termini of meiosis-  
745 specific double-strand breaks in yeast. *Proc Natl Acad Sci U S A* **92**, 11274-11278 (1995).
- 746 30. Prinz, S., Amon, A. & Klein, F. Isolation of COM1, a new gene required to complete meiotic  
747 double-strand break-induced recombination in *Saccharomyces cerevisiae*. *Genetics* **146**, 781-  
748 795 (1997).
- 749 31. McKee, A. H. & Kleckner, N. A general method for identifying recessive diploid-specific  
750 mutations in *Saccharomyces cerevisiae*, its application to the isolation of mutants blocked at  
751 intermediate stages of meiotic prophase and characterization of a new gene SAE2. *Genetics*  
752 **146**, 797-816 (1997).
- 753 32. Penkner, A. et al. A conserved function for a *Caenorhabditis elegans* Com1/Sae2/CtlP protein  
754 homolog in meiotic recombination. *EMBO J* **26**, 5071-5082 (2007).
- 755 33. Uanschou, C. et al. A novel plant gene essential for meiosis is related to the human CtlP and  
756 the yeast COM1/SAE2 gene. *EMBO J* **26**, 5061-5070 (2007).
- 757 34. Lukaszewicz, A., Howard-Till, R. A., Novatchkova, M., Mochizuki, K. & Loidl, J. MRE11 and  
758 COM1/SAE2 are required for double-strand break repair and efficient chromosome pairing  
759 during meiosis of the protist *Tetrahymena*. *Chromosoma* **119**, 505-518 (2010).

- 760 35. Hartsuiker, E. et al. Ctp1CtIP and Rad32Mre11 nuclease activity are required for Rec12Spo11  
761 removal, but Rec12Spo11 removal is dispensable for other MRN-dependent meiotic functions.  
762 *Mol Cell Biol* **29**, 1671-1681 (2009).
- 763 36. Gerton, J. L. et al. Inaugural article: global mapping of meiotic recombination hotspots and  
764 coldspots in the yeast *Saccharomyces cerevisiae*. *Proc Natl Acad Sci U S A* **97**, 11383-11390  
765 (2000).
- 766 37. Prieler, S., Penkner, A., Borde, V. & Klein, F. The control of Spo11's interaction with meiotic  
767 recombination hotspots. *Genes Dev* **19**, 255-269 (2005).
- 768 38. Pan, J. et al. A Hierarchical Combination of Factors Shapes the Genome-wide Topography of  
769 Yeast Meiotic Recombination Initiation. *Cell* **144**, 719-731 (2011).
- 770 39. Gittens, W. H. et al. A nucleotide resolution map of Top2-linked DNA breaks in the yeast and  
771 human genome. *Nature Communications* **10**, (2019).
- 772 40. Buhler, C., Borde, V. & Lichten, M. Mapping meiotic single-strand DNA reveals a new  
773 landscape of DNA double-strand breaks in *Saccharomyces cerevisiae*. *PLoS Biol* **5**, e324  
774 (2007).
- 775 41. Johnson, D. et al. Concerted cutting by Spo11 illuminates meiotic DNA break mechanics.  
776 *Nature* **594**, 572-576 (2021).
- 777 42. Ohta, K., Shibata, T. & Nicolas, A. Changes in chromatin structure at recombination initiation  
778 sites during yeast meiosis. *EMBO J* **13**, 5754-5763 (1994).
- 779 43. Wu, T. C. & Lichten, M. Meiosis-induced double-strand break sites determined by yeast  
780 chromatin structure. *Science* **263**, 515-518 (1994).
- 781 44. Borde, V., Goldman, A. S. & Lichten, M. Direct coupling between meiotic DNA replication and  
782 recombination initiation. *Science* **290**, 806-809 (2000).
- 783 45. Murakami, H. & Keeney, S. Temporospatial Coordination of Meiotic DNA Replication and  
784 Recombination via DDK Recruitment to Replisomes. *Cell* **158**, 861-873 (2014).
- 785 46. Blitzblau, H. G., Chan, C. S., Hochwagen, A. & Bell, S. P. Separation of DNA replication from  
786 the assembly of break-competent meiotic chromosomes. *PLoS Genet* **8**, e1002643 (2012).
- 787 47. Sun, X. et al. Transcription dynamically patterns the meiotic chromosome-axis interface. *Elife* **4**,  
788 (2015).
- 789 48. Ito, M. et al. Meiotic recombination cold spots in chromosomal cohesion sites. *Genes Cells* **19**,  
790 359-373 (2014).
- 791 49. Kugou, K. et al. Rec8 guides canonical Spo11 distribution along yeast meiotic chromosomes.  
792 *Mol Biol Cell* **20**, 3064-3076 (2009).
- 793 50. Borde, V. et al. Histone H3 lysine 4 trimethylation marks meiotic recombination initiation sites.  
794 *EMBO J* **28**, 99-111 (2009).
- 795 51. Tischfield, S. E. & Keeney, S. Scale matters: The spatial correlation of yeast meiotic DNA  
796 breaks with histone H3 trimethylation is driven largely by independent colocalization at  
797 promoters. *Cell Cycle* **11**, (2012).
- 798 52. Blitzblau, H. G., Bell, G. W., Rodriguez, J., Bell, S. P. & Hochwagen, A. Mapping of meiotic  
799 single-stranded DNA reveals double-stranded-break hotspots near centromeres and telomeres.  
800 *Curr Biol* **17**, 2003-2012 (2007).
- 801 53. Subramanian, V. V. et al. Persistent DNA-break potential near telomeres increases initiation of  
802 meiotic recombination on short chromosomes. *Nat Commun* **10**, 970 (2019).
- 803 54. Vader, G. et al. Protection of repetitive DNA borders from self-induced meiotic instability. *Nature*  
804 (2011).
- 805 55. Sasaki, M., Tischfield, S. E., van Overbeek, M. & Keeney, S. Meiotic Recombination Initiation in  
806 and around Retrotransposable Elements in *Saccharomyces cerevisiae*. *PLoS Genet* **9**,  
807 e1003732 (2013).
- 808 56. Garcia, V., Gray, S., Allison, R. M., Cooper, T. J. & Neale, M. J. Tel1(ATM)-mediated  
809 interference suppresses clustered meiotic double-strand-break formation. *Nature* **520**, 114-118  
810 (2015).
- 811 57. Ciccica, A. & Elledge, S. J. The DNA damage response: making it safe to play with knives. *Mol*  
812 *Cell* **40**, 179-204 (2010).
- 813 58. Zhang, L., Kleckner, N. E., Storlazzi, A. & Kim, K. P. Meiotic double-strand breaks occur once  
814 per pair of (sister) chromatids and, via Mec1/ATR and Tel1/ATM, once per quartet of  
815 chromatids. *Proc Natl Acad Sci U S A* **108**, 20036-20041 (2011).
- 816 59. Carballo, J. A. et al. Budding Yeast ATM/ATR Control Meiotic Double-Strand Break (DSB)  
817 Levels by Down-Regulating Rec114, an Essential Component of the DSB-machinery. *PLoS*  
818 *Genet* **9**, e1003545 (2013).

- 819 60. Mohibullah, N. & Keeney, S. Numerical and spatial patterning of yeast meiotic DNA breaks by  
820 Tel1. *Genome Res* **27**, 278-288 (2017).
- 821 61. Lukaszewicz, A., Lange, J., Keeney, S. & Jasin, M. Control of meiotic double-strand-break  
822 formation by ATM: local and global views. *Cell Cycle* **17**, 1155-1172 (2018).
- 823 62. Prieler, S. et al. Spo11 generates gaps through concerted cuts at sites of topological stress.  
824 *Nature* **594**, 577-582 (2021).
- 825 63. Fowler, K. R., Hyppa, R. W., Cromie, G. A. & Smith, G. R. Physical basis for long-distance  
826 communication along meiotic chromosomes. *Proceedings of the National Academy of Sciences*  
827 **201801920** (2018).
- 828 64. Joyce, E. F. et al. Drosophila ATM and ATR have distinct activities in the regulation of meiotic  
829 DNA damage and repair. *J Cell Biol* **195**, 359-367 (2011).
- 830 65. Lange, J. et al. ATM controls meiotic double-strand-break formation. *Nature* **479**, 237-240  
831 (2011).
- 832 66. Lange, J. et al. The Landscape of Mouse Meiotic Double-Strand Break Formation, Processing,  
833 and Repair. *Cell* (2016).
- 834 67. Lukaszewicz, A., Lange, J., Keeney, S. & Jasin, M. De novo deletions and duplications at  
835 recombination hotspots in mouse germlines. *Cell* **184**, 5970-5984.e18 (2021).
- 836 68. Kurzbauer, M. T. et al. ATM controls meiotic DNA double-strand break formation and  
837 recombination and affects synaptonemal complex organization in plants. *Plant Cell* **33**, 1633-  
838 1656 (2021).
- 839 69. Guo, H. et al. Phosphoregulation of DSB-1 mediates control of meiotic double-strand break  
840 activity. *Elife* **11**, (2022).
- 841 70. Usui, T., Ogawa, H. & Petrini, J. H. A DNA damage response pathway controlled by Tel1 and  
842 the Mre11 complex. *Mol Cell* **7**, 1255-1266 (2001).
- 843 71. Niu, H. et al. Partner choice during meiosis is regulated by Hop1-promoted dimerization of  
844 Mek1. *Mol Biol Cell* **16**, 5804-5818 (2005).
- 845 72. de los Santos, T. & Hollingsworth, N. M. Red1p, a MEK1-dependent phosphoprotein that  
846 physically interacts with Hop1p during meiosis in yeast. *J Biol Chem* **274**, 1783-1790 (1999).
- 847 73. Prugar, E., Burnett, C., Chen, X. & Hollingsworth, N. M. Coordination of Double Strand Break  
848 Repair and Meiotic Progression in Yeast by a Mek1-Ndt80 Negative Feedback Loop. *Genetics*  
849 **206**, 497-512 (2017).
- 850 74. Carballo, J. A., Johnson, A. L., Sedgwick, S. G. & Cha, R. S. Phosphorylation of the axial  
851 element protein Hop1 by Mec1/Tel1 ensures meiotic interhomolog recombination. *Cell* **132**,  
852 758-770 (2008).
- 853 75. Harper, J. W. & Elledge, S. J. The DNA damage response: ten years after. *Mol Cell* **28**, 739-745  
854 (2007).
- 855 76. Schwacha, A. & Kleckner, N. Interhomolog bias during meiotic recombination: meiotic functions  
856 promote a highly differentiated interhomolog-only pathway. *Cell* **90**, 1123-1135 (1997).
- 857 77. Thacker, D., Mohibullah, N., Zhu, X. & Keeney, S. Homologue engagement controls meiotic  
858 DNA break number and distribution. *Nature* **510**, 241-246 (2014).
- 859 78. Chu, S. et al. The transcriptional program of sporulation in budding yeast. *Science* **282**, 699-705  
860 (1998).
- 861 79. Chu, S. & Herskowitz, I. Gametogenesis in yeast is regulated by a transcriptional cascade  
862 dependent on Ndt80. *Mol Cell* **1**, 685-696 (1998).
- 863 80. Hepworth, S. R., Friesen, H. & Segall, J. NDT80 and the meiotic recombination checkpoint  
864 regulate expression of middle sporulation-specific genes in *Saccharomyces cerevisiae*. *Mol Cell*  
865 *Biol* **18**, 5750-5761 (1998).
- 866 81. Xu, L., Ajimura, M., Padmore, R., Klein, C. & Kleckner, N. NDT80, a meiosis-specific gene  
867 required for exit from pachytene in *Saccharomyces cerevisiae*. *Mol Cell Biol* **15**, 6572-6581  
868 (1995).
- 869 82. Sourirajan, A. & Lichten, M. Polo-like kinase Cdc5 drives exit from pachytene during budding  
870 yeast meiosis. *Genes Dev* **22**, 2627-2632 (2008).
- 871 83. Murakami, H. et al. Multilayered mechanisms ensure that short chromosomes recombine in  
872 meiosis. *Nature* **582**, 124-128 (2020).
- 873 84. Malone, R. E. et al. Isolation of mutants defective in early steps of meiotic recombination in the  
874 yeast *Saccharomyces cerevisiae*. *Genetics* **128**, 79-88 (1991).
- 875 85. Ajimura, M., Leem, S. H. & Ogawa, H. Identification of new genes required for meiotic  
876 recombination in *Saccharomyces cerevisiae*. *Genetics* **133**, 51-66 (1993).
- 877 86. Klein, F. et al. A central role for cohesins in sister chromatid cohesion, formation of axial  
878 elements, and recombination during yeast meiosis. *Cell* **98**, 91-103 (1999).

- 879 87. Møens, P. B. & Pearlman, R. E. Chromatin organization at meiosis. *Bioessays* **9**, 151-153  
880 (1988).
- 881 88. Schalbetter, S. A., Fudenberg, G., Baxter, J., Pollard, K. S. & Neale, M. J. Principles of meiotic  
882 chromosome assembly revealed in *S. cerevisiae*. *Nat Commun* **10**, 4795 (2019).
- 883 89. Kumar, R., Bourbon, H. M. & de Massy, B. Functional conservation of Mei4 for meiotic DNA  
884 double-strand break formation from yeasts to mice. *Genes Dev* **24**, 1266-1280 (2010).
- 885 90. Mu, X., Murakami, H., Mohibullah, N. & Keeney, S. Chromosome-autonomous feedback down-  
886 regulates meiotic DNA break competence upon synaptonemal complex formation. *Genes Dev*  
887 **34**, 1605-1618 (2020).
- 888 91. Gray, S., Allison, R. M., Garcia, V., Goldman, A. S. H. & Neale, M. J. Positive regulation of  
889 meiotic DNA double-strand break formation by activation of the DNA damage checkpoint kinase  
890 Mec1(ATR). *Open Biol* **3**, 130019 (2013).
- 891
- 892

## 893 EXTENDED METHODS

### 894 DSB and DC quantifications

895 DSBs and DCs were quantified with Image gauge software (Fuji). The DSB profile was defined  
896 by drawing lanes from the base of the parental band down to the end of the last quantifiable  
897 DSB. Background signal was manually removed with a linear subtraction. The signal above  
898 the threshold was quantified as a specific signal. DSBs and DCs were quantified as a fraction  
899 of the total lane signal observed on gel (which included uncut parental plus all the visible  
900 bands). Bands that were observed at time = 0 hours were considered nonspecific and thus  
901 not quantified. At the *HIS4::LEU2* locus, the fraction of DCs detected with the *LEU2* central  
902 probe was multiplied by 3 in order to correct for the fact that only a third of the detected parental  
903 DNA signal is derived from the *HIS4::LEU2* locus because these strains contain three copies  
904 of the *LEU2* gene (*his4X::LEU2*, *leu2::hisG* and *nuc1::LEU2*). For *ARE1* and *YCR061W*  
905 hotspots, the main hotspot (F and N, respectively) was measured with an adjacent probe on  
906 the side where there were fewer DSBs prior to the main hotspot, and then corrected by adding  
907 the double cuts event present at that region. In the case of *ARE1*, F was measured from the  
908 right using *PWP2* probe and the value corrected by adding FI double cuts measured with  
909 *ARE1* probe. In the case of *YCR061W*, the main hotspot, N, was measured from the right  
910 using *YCR061WII* probe and corrected by adding NO double cuts measured with *YCR061WI*  
911 probe. Similarly, at *HIS4::LEU2-leu2::hisG* loci, quantification of the *leu2::hisG* hotspot was  
912 measured using *CHA1* probe and corrected by adding *HIS4::LEU2-leu2::hisG* double-cuts  
913 measured with *FRM2* probe. Quantification of the single or double DSB events were displayed  
914 as an average of 6, 8 (and occasionally 10) hours after meiosis induction from each repeat.  
915 The number of biological repeats is indicated in figure legends. For **Fig 1–2**, measurements  
916 from the *NDT80+* background were an average of the data published by Garcia et al (2015)  
917 and one and two extra biological replicates developed in this analysis (as specified in figure  
918 legends). For **Fig S2–4**, measurements from the *NDT80+* background came only from the  
919 data published by Garcia et al (2015).

920

## 921 **Calculations of DSB interference**

922 To study DSB interference between two hotspots, the observed frequency of double DSB  
923 events that arise at the same molecule (observed DCs) was compared with the expected  
924 frequency on the assumption of independence (expected DCs) as described in **Fig S1f–j**.  
925 Such expected DC frequency was estimated from multiplication of the frequencies of single  
926 DSB events between which DSB interference is studied. To study the strength of interference,  
927 the coefficient of coincidence (CoC) was estimated by dividing the observed frequency of DCs  
928 by the frequency of expected DCs and subtracting this value from 1 (**Fig S1k**). Positive values  
929 close to 1 indicated strong interference, values close to zero indicated independence (no  
930 interference) and negative values indicate concerted DSB activity (**Fig S1l**). DSB interference  
931 was calculated on a time course basis—from the time 6 and 8 h averaged frequencies—and  
932 then averaged across all time courses.

933

934 As an example, at *HIS4::LEU2*, the frequency of DCs between DSB I and DSB II was  
935 measured with a central probe *LEU2* (**Fig 1c,i**). The averaged observed DCs from time 6 and  
936 8 hours, was then compared with the expected frequency of coincident cuts (also averaged  
937 time 6 and 8 hours) obtained by multiplying the averaged frequency of DSB I (measured with  
938 *MXR2* probe) and DSB II (measured with *HIS4* probe) (**Fig 1c,d-e, l**). Strength of interference  
939 was then measured from 1 minus [(Averaged observed DC DSB I–DSB II) / (Averaged  
940 expected DC)] frequency in several biological repeats (n = 6 in the case of *NDT80+*  
941 background and n = 5 in the case of *ndt80Δ* background) (**Fig 1m**). Using this method, one  
942 interference measurement was produced for every repeat and then averaged. Standard  
943 deviation and SEM was estimated and a two-tailed T-test performed to measure significant  
944 differences between the strains as indicated in the figure legends.

945

## 946 **Limitations of the Southern blot and pulsed-field gel electrophoresis techniques**

947 Due to the requirement of multiple gels and the limited resolution of Southern blots and PFGE  
948 methods, DSB and DC quantifications are best estimates given the following technical  
949 limitations. First, the analysis of many gels analysed in this study indicated that the magnitude  
950 of the values varies between both biological and technical repeats depending on gel/blot  
951 quality. Second, the strength of the band signal highly influences the quantifications. For  
952 instance, weak hotspots are more difficult to characterise than strong ones. Moreover,  
953 quantification of DC molecules is challenging in the *TEL1+* background because the level of  
954 coincident DSBs is low and generally at or below the detection limit, therefore most of the  
955 signal measured is background signal which sometimes can be higher than the calculated  
956 expected random frequency (if any of the hotspots is weak) and thus leading to an  
957 underestimate of interference strength (e.g. hotspot N and Q; **Fig S3g-h**). Finally, because



958 the strength of DSB interference is calculated using the division of the observed frequency of  
959 double-cut molecules by the frequency expected from independence, the result may be  
960 inaccurate when the observed and expected values are close to zero because it produces a  
961 disproportionate relative difference that may be artefactual. For example, for this reason the  
962 strength of interference was excluded between NO at the *YCR061W* hotspot in the *sae2Δ* and  
963 *sae2Δ ndt80Δ* (Fig S3I).

964

965 Another limitation of these techniques is that they only permit an estimate of the number of  
966 broken chromatids and not how many times a chromatid has been broken, therefore,  
967 quantification of the total frequency of DSBs may be underestimated if the frequency of double  
968 events is high (as is the case of *tel1Δ* mutants). Furthermore, the direction and distance from  
969 the probe to the hotspot also influences the accuracy of hotspot detection. For example, due  
970 to hotspots having a width of 100–300 bp, when the inter-hotspot distance is very short (e.g.  
971 hotspots NO, 0.7 kb apart; Fig S3a), DC sizes are more variable as a proportion of their length,  
972 and the DC probe may also overlap with the DSB positions—both of which may affect their  
973 detection on gels.

974

975 On the other hand, when the distance between the probe and the measured hotspot is large,  
976 the presence of hotspots close to the probe will cause an underestimate of the real frequency  
977 of DSBs that are further away. For instance, quantification of the main *ARE1* hotspot “F”  
978 slightly differs when measured from the right side of the DSB using *PWP2* probe or from the  
979 left with the *TAF2* probe (Fig S2). In this example, measurement of F with *TAF2* reported a  
980 lower amount of F than *PWP2* probe probably due to the presence of the strong hotspot E  
981 prior to F, thus closer to the *TAF2* probe.

982

983 The location of the probe is also another factor to consider, especially when a DSB only arises  
984 concertedly with another DSB. This seems to be the case of the band smear at *HIS4::LEU2*  
985 locus detected with *MXR2* and *LEU2* probe but not *HIS4* probe in *sae2Δ ndt80Δ tel1Δ* mutants  
986 (Fig 1d,i, red arrow). In fact, the smear detected with the *LEU2* probe indicates the presence  
987 of shorter DCs, which would be consistent with either DSB I or DSB II, or both, cutting in  
988 different positions within the DSB I–DSB II region. The fact that we can only observe spreading  
989 from one side (using *MXR2* probe) indicates that such alternative cutting only happens when  
990 DSB I and DSB II cut coincidentally, and thus the presence of DSB I will obscure DSB II if  
991 measured with *HIS4* probe. Despite these caveats, Southern-blotting techniques are a highly  
992 valuable tool to estimate DSB interference at specific loci.

993

994

## 995 **Hotspot identification**

996 Due to the potential variations in the DSB formation displayed in some of the mutants used in  
997 this research, a new template of hotspot coordinates was developed in a similar manner to  
998 that described in Pan et al (2011) (**Fig S5a**). Hotspots were identified in our baseline *sae2Δ*  
999 *ndt80Δ* strains, as well as in other pertinent mutants using a 201 bp Hann window to smooth  
1000 the Spo11 HpM (hits per million mapped reads) frequency, minimum length of 25 bp and 25  
1001 reads and a cut-off of 0.193 HpM. Hotspots separated by < 200 bp were merged and  
1002 considered as a single hotspot. The new hotspot mask—referred to as the “Neale template”—  
1003 initially identified a total of 3486 hotspots from a pooled combination of *sae2Δ ndt80Δ* and  
1004 *sae2Δ ndt80Δ tel1Δ* libraries (3289 were called in *sae2Δ ndt80Δ* and 3131 in *sae2Δ ndt80Δ*  
1005 *tel1Δ*) (**Table S4**). 13 of the 3486 hotspots were identified at the rDNA region (position  
1006 451640–467844 kb) and therefore removed, reducing the total number of the called hotspots  
1007 to 3473. From those, a total of 3195 hotspots called in this analysis were also defined by Pan  
1008 et al (2011) (**Fig S5b**) and 3323 by Mohibullah<sup>58</sup> using the Spo11-oligo maps performed in the  
1009 Spo11-HA3 and Spo11-ProtA backgrounds respectively (**Fig S5c**), thus validating that most  
1010 of the hotspots positions we identify are congruent. Moreover, 278 and 150 hotspots, if  
1011 compared against either Pan’s template or Mohibullah’s template respectively (**Fig S5b-c**),  
1012 were exclusively defined in our *sae2Δ ndt80Δ* background strains with CC-seq technique, most  
1013 of which were weak (**Fig S5d**; data not shown). Similarly, 406 and 587 of the specific hotspots  
1014 only defined by either Pan or Mohibullah, respectively, using the Spo11-oligo technique were  
1015 also shown to be weak (**Fig S5e-f**). Next, to investigate whether these hotspots were Spo11-  
1016 specific, hotspots were called in a *sae2Δ ndt80Δ spo11-Y135F* library identifying a total of 109  
1017 potentially false hotspots (**Fig S5g**). For this latter analysis, the cut off was lowered to 0.125  
1018 HpM because no hotspots were called with a cut-off of 0.193 HpM. As expected, all the  
1019 hotspots called in the *sae2Δ ndt80Δ spo11-Y135F* library were weak (**Fig S5h**). Of those 109  
1020 Spo11-nonspecific hotspots, 32 were also called in our new template. Upon visualisation, all  
1021 32 hotspots were very weak (data not shown). For detailed information about the mechanics  
1022 of the scripts see **Hotspot\_identification\_V1**, **Hotspot\_analysis\_V1** in  
1023 [https://github.com/Neale-Lab/Ndt80\\_LLR](https://github.com/Neale-Lab/Ndt80_LLR).

## 1024 **Script summary description**

1025 **Averaging\_FullMap\_tables\_V1**: This script averages individual FullMap biological replicates  
1026 into a combined FullMap where the sum of HpM equals 1 million.

1027 **Calculating background reads\_V1**: This script estimates the percentage of signal registered  
1028 within the 47 largest genes—regions of presumed Spo11 inactivity—in the *S. cerevisiae*  
1029 genome as an estimate of the background noise per base pair.

1030 **Hotspot\_analysis\_V1:** This script performs pairwise comparisons between datasets to study  
1031 the degree of overlap, specificity, and density of the identified hotspots (generating Venn  
1032 diagrams and histograms).

1033 **Hotspot\_identification\_V1:** This script identifies position and length of hotspots on single or  
1034 multiple Spo11-DSB libraries. The total HpM signal is smoothed with a 201 Hann window. A  
1035 cut-off of 0.193 HpM is then applied to remove the background noise. Hotspots are defined  
1036 setting a minimum length of 25 bp and a minimum number of reads of 25. Hotspots separated  
1037 by < 200 bp are merged and considered as a single hotspot. Hotspots are defined in each  
1038 library separately and then combined to produce a single hotspot template that defines the  
1039 position of every hotspot identified in the libraries.

1040 **Hotspot\_Smooth\_ratios\_V1:** This script calculates and represents the hotspot fold changes  
1041 between two libraries (the NormHpM ratio).

1042 **Hotspot\_table\_V1:** This script calculates the HpM and NormHpM signal included within each  
1043 hotspot. Detailed description of the term heading lists is included in **Hotspot Table**  
1044 **Definitions.docx** at [https://github.com/Neale-Lab/Ndt80\\_LLRL](https://github.com/Neale-Lab/Ndt80_LLRL). Briefly, NormHpM refers to  
1045 the total Spo11 CC-seq signal present in each hotspot (after subtraction of estimated  
1046 background noise/bp) expressed as a fraction of the total signal in all the hotspot regions.  
1047 NormHpM values are more robust to differences in library-to-library noise than the raw HpM  
1048 values (LLR and MJN, unpublished observations).

1049 **NormHpM\_V1:** This script generates DSB maps representing the position and frequency of  
1050 hotspots (NormHpM or NormHpChr).

1051 **Pearson\_correlation\_V1:** This script analyses the correlation between the hotspot strengths  
1052 of different datasets (NormHpM and NormHpChr Pearson correlation).

1053 **Ratio\_heatmaps\_V1:** This script calculates and represents the hotspot fold changes between  
1054 two libraries (NormHpM) at 50 kb bin intervals on a per chromosome base ranked by  
1055 chromosome size and centred at the centromere.

1056 **Spo11 mapping Totals\_V1:** This script represents the position and frequency of the Spo11-  
1057 DSBs signal (Total HpM) along the chromosome.

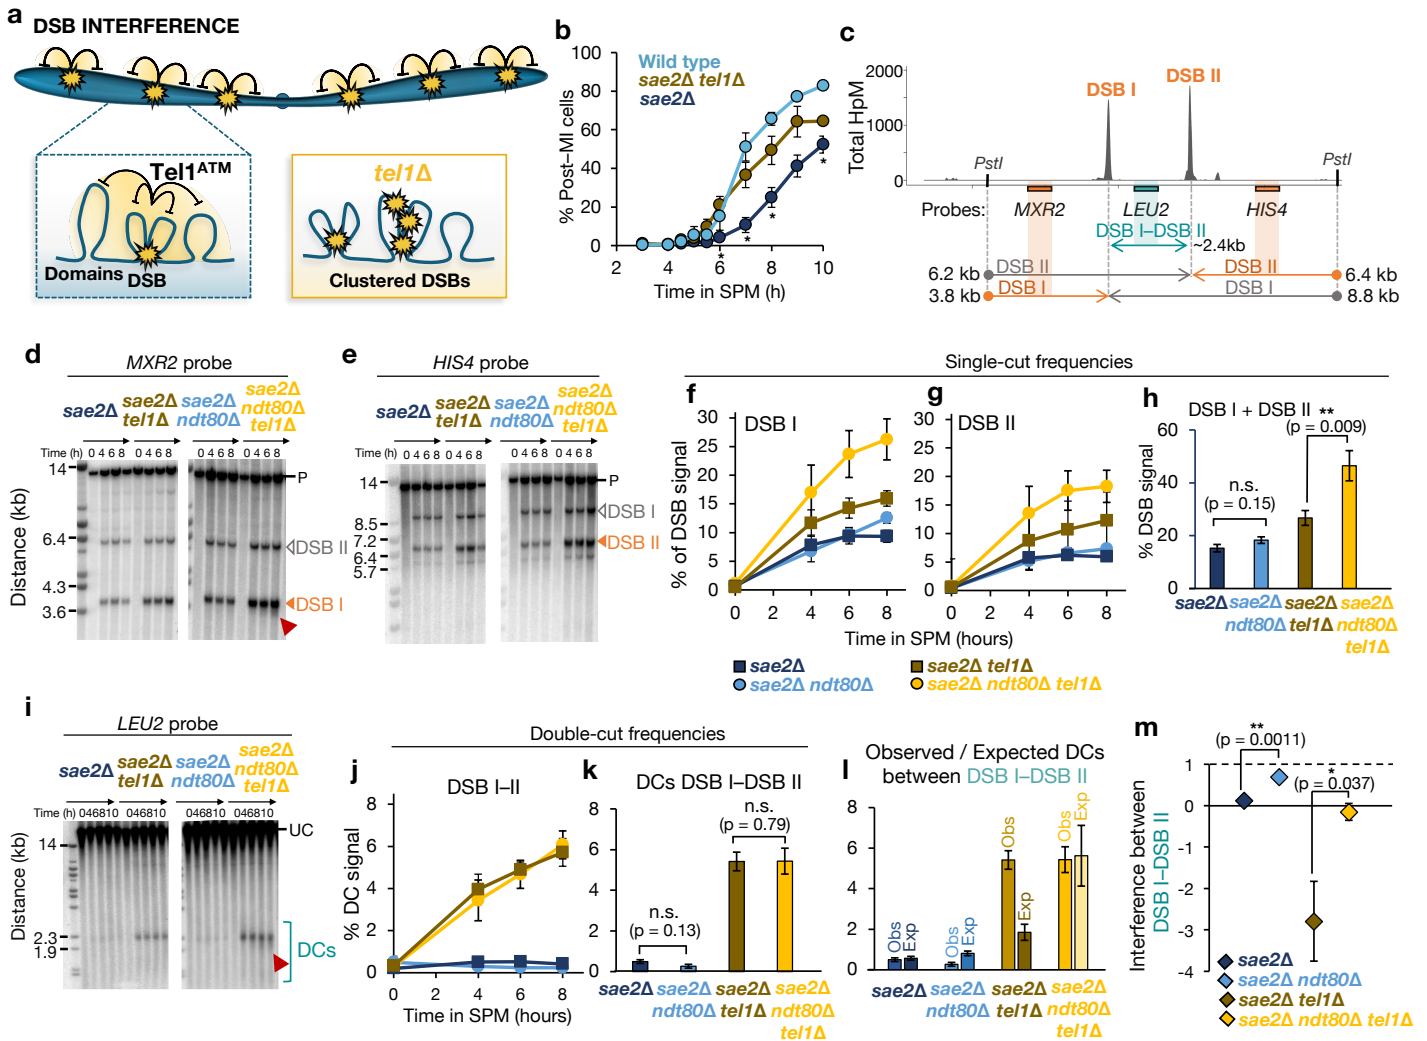

**Figure 1. Deletion of *NDT80* ablates negative interference at the *HIS4::LEU2* hotspot.** **a**, Schematic representation of the spatial distribution of DSBs by Tel1 DSB interference in the context of the chromosome and the chromosome structure. In the absence of Tel1, the frequency of DSBs increases and DSBs are no longer subject to spatial regulation. **b**, Meiotic nuclear division (MI and MII) kinetics were assessed by counting the appearance of bi-, tri- and tetra-nucleate DAPI-stained cells. At least 100–200 cells were scored for each timepoint after inducing meiosis entry. Averages of  $n = 2$  (Wild type) or  $n = 3$  (*sae2Δ* and *sae2Δ tel1Δ*) are represented. Asterisks indicate significant differences ( $p < 0.05$ ) between *sae2Δ* and *sae2Δ tel1Δ* cells at the indicated timepoints. **c**, Diagram of the *HIS4::LEU2* hotspot showing Spo11-DSB positions as detected by CC-seq in hits per million (HpM; Gittens et al., 2019), and, for Southern blotting experiments, the restriction enzyme sites, probes and size of fragments obtained from each probe. **d–e**, Representative Southern blots of genomic DNA isolated at the specified times hybridised with *MXR2* (**d**), and *HIS4* (**e**) probes. DSBs were marked with a white (non-quantified) or orange (quantified) filled triangle. Red

arrows indicated DSB smear on the gels; P, *PstI* digested parental fragment. **f–g**, Quantification of DSB I (**f**), and DSB II (**g**) at the indicated timepoints. **h**, Summary of total DSBs calculated by summing DSB I and DSB II single DSBs (average of 6–8 h time points). **i**, As in **f–g** but with undigested gDNA samples at the indicated timepoints and hybridized with *LEU2* probe. Double cuts (DCs) were highlighted with a blue open bracket. UC, Uncut parental. **j**, Quantification of DC signal at the indicated time points. **k**, Summary of the observed DCs between DSB I and DSB II (average of 6–8 h time points). **l**, Quantification of observed and expected DC frequencies using averaged data from 6–8 h time points in the indicated strains. **m**, DSB interference between DSB I and DSB II calculated for each individual repeat and then averaged (see Extended methods, “Calculation of DSB interference”). Error bars indicate SEM between individual repeats. For statistical analysis, a two-tailed t-test with equal variance samples was performed.  $n = 6$  for *NDT80+* (4 repeats were used from Garcia et al 2015 and averaged with 2 biological repeats generated in this project) and  $n = 5$  for *ndt80Δ* backgrounds.

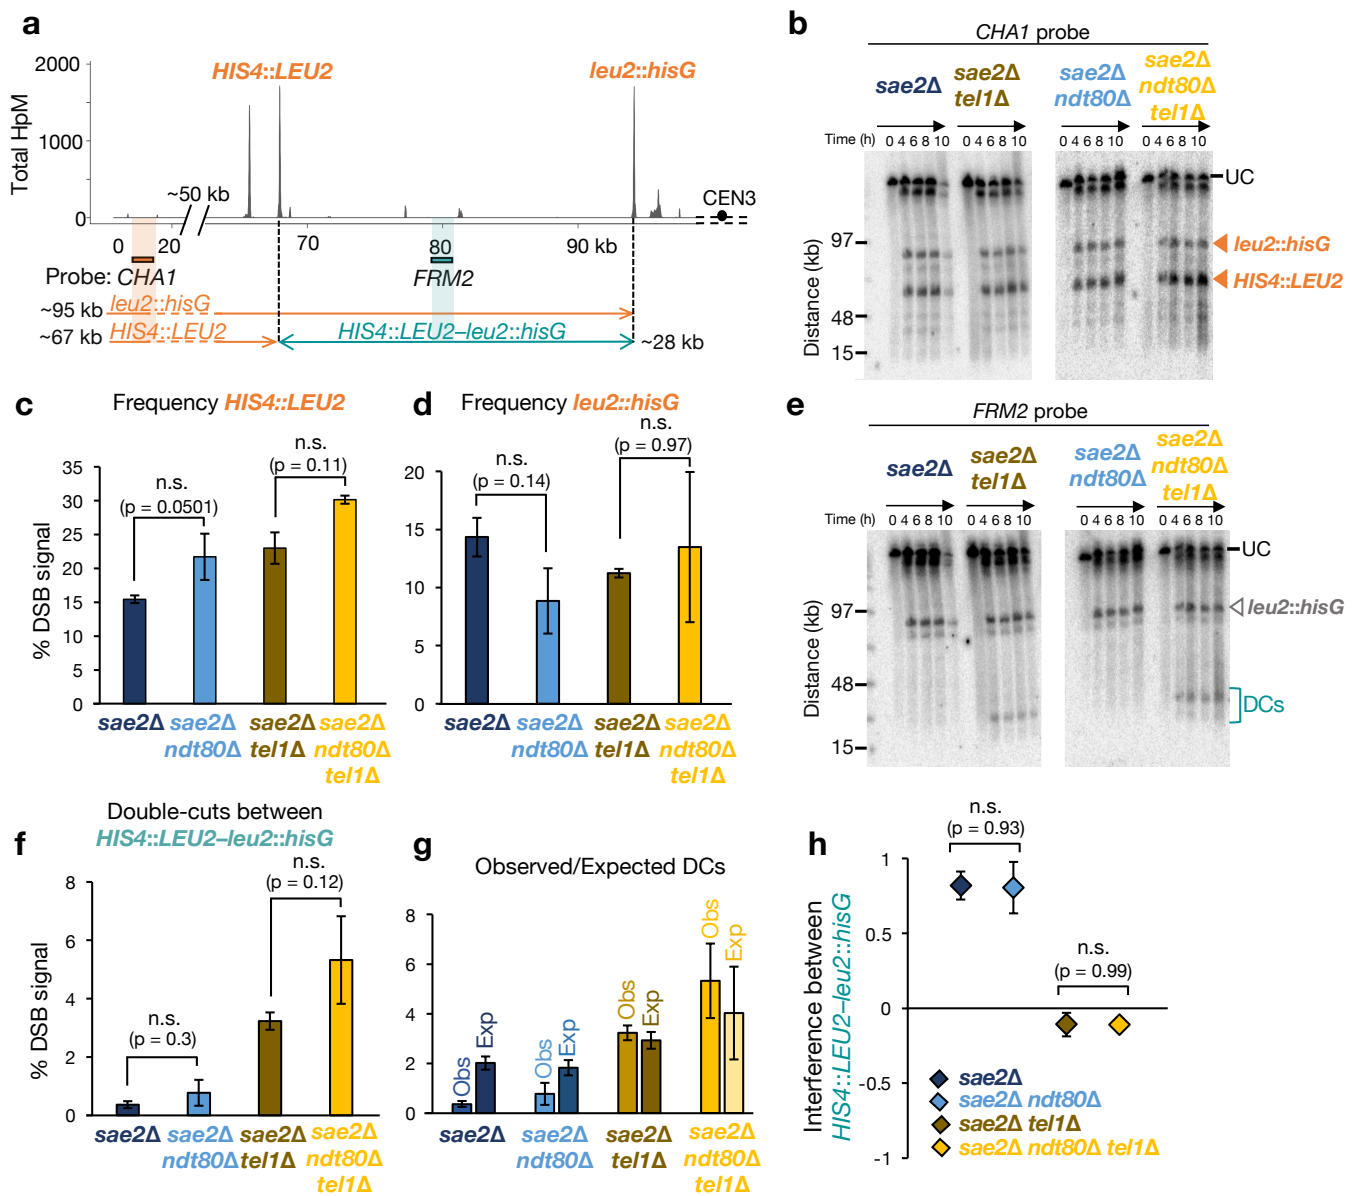

**Figure 2. Deletion of *NDT80* does not alter Tel1 DSB interference over medium distances.** **a**, Diagram of the *HIS4::LEU2-leu2::hisG* region showing positions of the DSBs as measured by CC-seq in hits per million (HpM; Gittens et al., 2019) and, for Southern blotting experiments, the probes and size of fragments obtained from each probe. **b**, Representative Southern blots of agarose-embedded genomic DNA isolated at the specified times separated by PFGE, hybridized with *CHA1* probe. *HIS4::LEU2* and *leu2::hisG* hotspots are marked with an orange triangle. **c–d**, Average quantification (6 and 8 hours) of *HIS4::LEU2* (**c**) and *leu2::hisG* (**d**) hotspots. Due to the distance from the *CHA1* probe, the *leu2::hisG* DSB frequency is calculated by adding on the frequency of DCs as measured with the *FRM2* probe (as in Garcia et al 2015). **e**, As in (**b**) but hybridized with *FRM2* probe. Double cuts

(DCs) between *HIS4::LEU2-leu2::hisG* are marked with a blue open bracket. UC, Uncut parental. **f**, Average quantification (6 and 8 hours) of DCs between *HIS4::LEU2-leu2::hisG*. **g**, Quantification of observed and expected DC frequencies using averaged data from 6–8 h time points in the indicated strains. **h**, DSB interference between *HIS4::LEU2* and *leu2::hisG* hotspots was calculated for each individual repeat and then averaged (see Extended methods, “Calculation of DSB interference”). Error bars indicate SEM between individual repeats. For statistical analysis, a two-tailed t-test with equal variance samples was performed.  $n=5$  for *NDT80*<sup>+</sup> (4 repeats were used from Garcia et al 2015 and averaged with 1 biological repeat generated in this project) and  $n=2$  for *ndt80* $\Delta$  backgrounds.

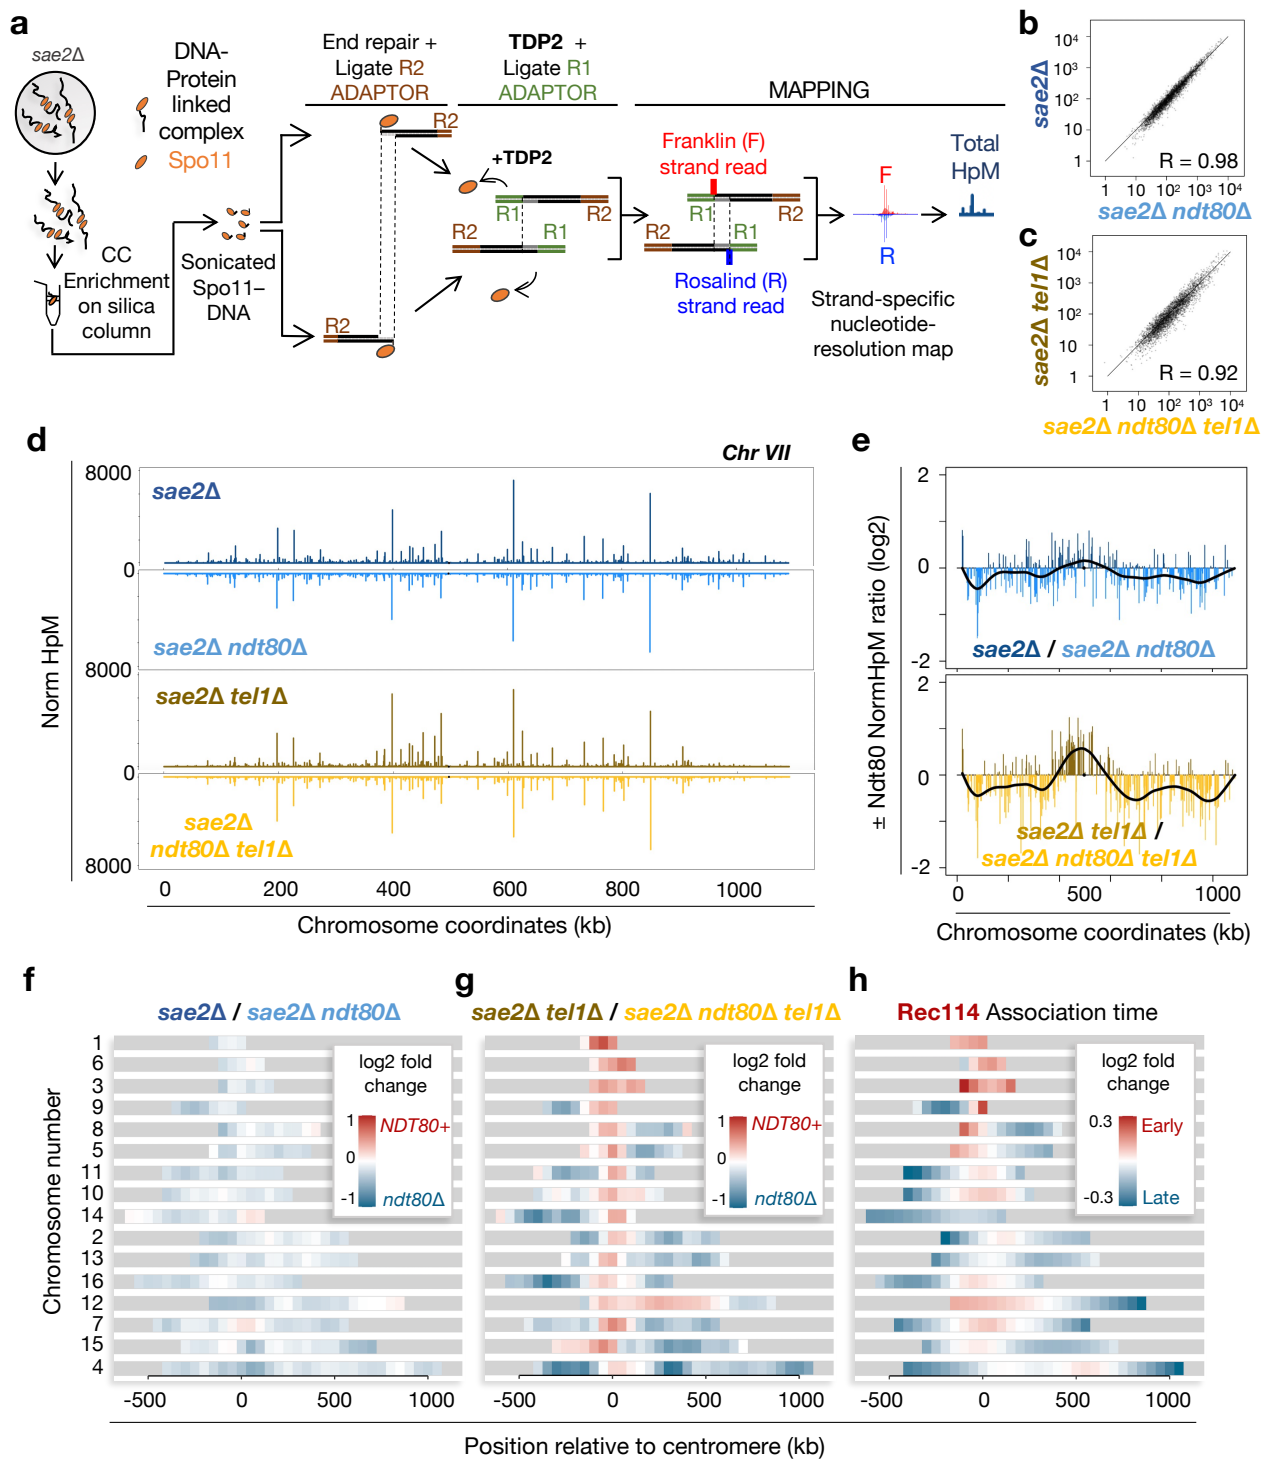

**Figure 3. Deletion of *NDT80* influences the distribution of DSBs at a genome-wide scale.**

**a**, Schematic of the genome-wide CC-seq Spo11-DSB mapping technique (see Extended methods). **b–c**, Pearson correlation of Spo11 hotspot strengths (NormHpM) in the presence and absence of Ndt80 in *TEL1+* (**b**) and *tel1Δ* cells (**c**). **d**, Visualization of the relative Spo11 hotspot intensities on chromosome VII in the indicated strains. **e**, Ratio of relative Spo11 hotspot intensities  $\pm$ *NDT80* on chromosome VII in the presence (upper panel) and absence (lower panel) of *Tel1*. Values above zero indicate a higher DSB

frequency in the presence of Ndt80 and below zero a higher DSB frequency in the absence of Ndt80. Fold change was smoothed to highlight the spatial trend effect of *NDT80* deletion (black line). Other chromosomes are presented in **Fig S6**. **f–g**, Heat maps representing  $\pm$ Ndt80 effect in the presence (**f**) and absence of *Tel1* (**g**). Log<sub>2</sub> ratio of relative hotspot strengths  $\pm$ *NDT80* was binned into 50 kb intervals and plotted centred at the centromere and ranked by chromosome size. **h**, Pattern of relative *Rec114* association time, reported by Murakami et al (2020) and presented as in **f–g**.

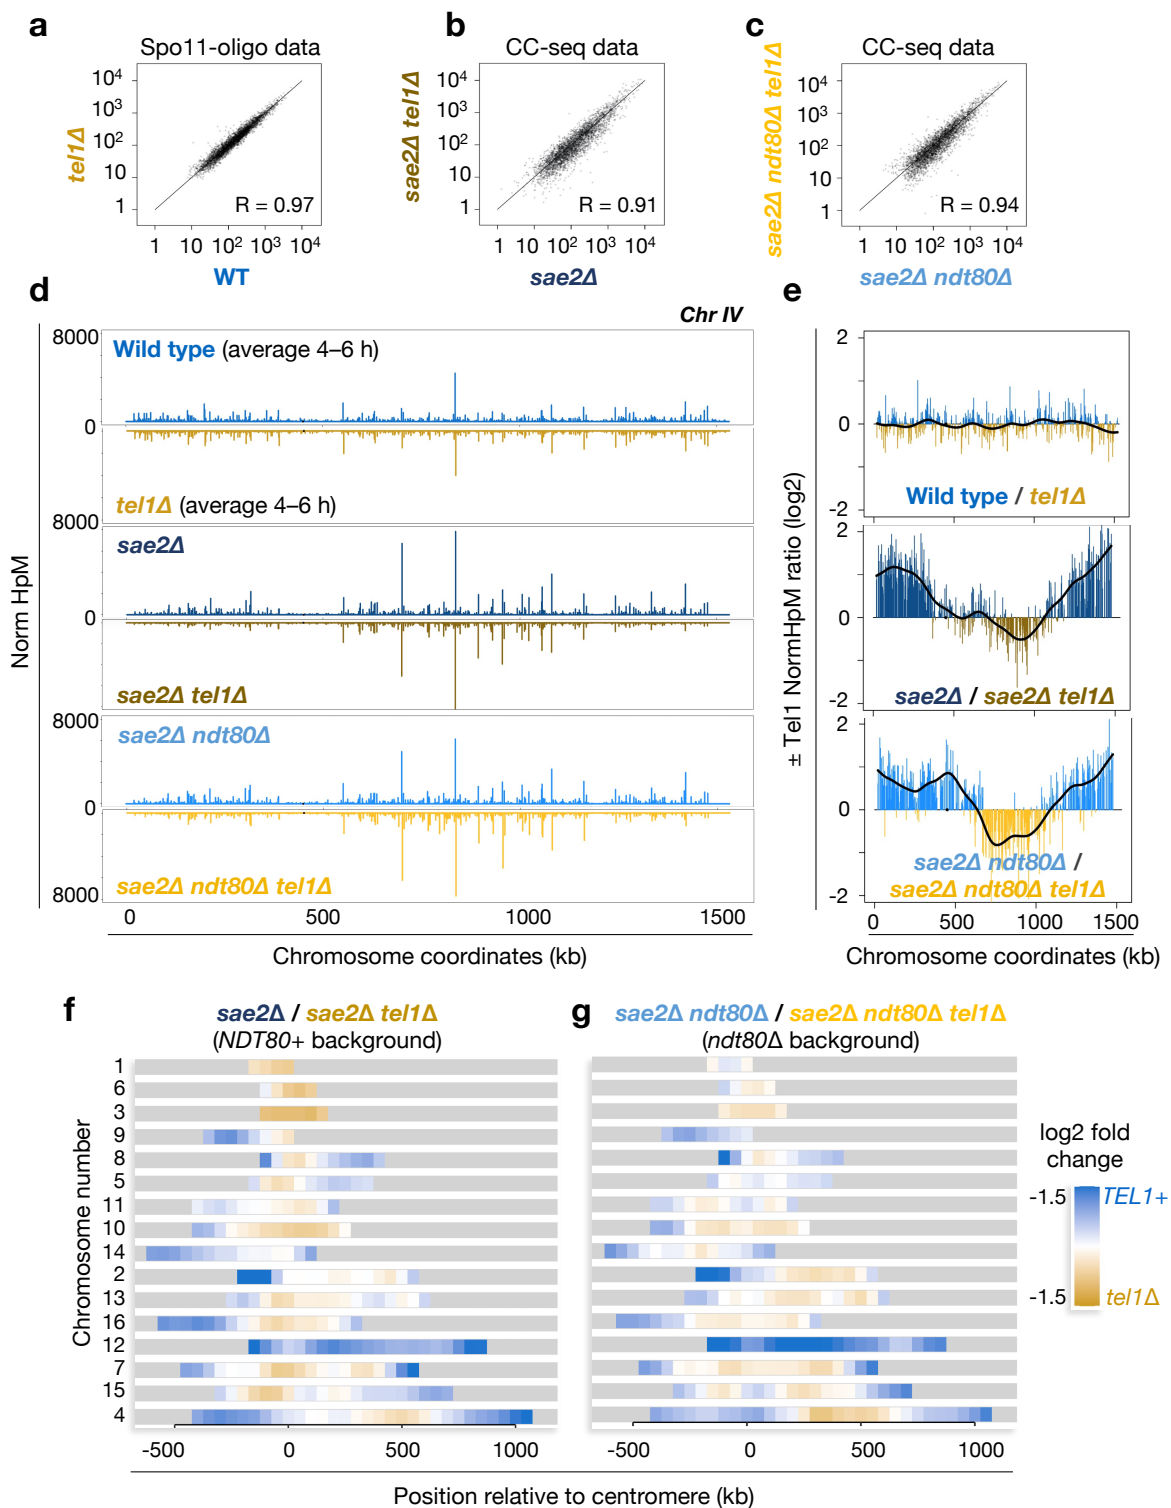

**Figure 4. Tel1-dependent genome-wide effect on DSB distribution.** **a–c**, Pearson correlation of Spo11 hotspot strengths (NormHpM) in the presence and absence of Tel1 in *SAE2+* (Spo11-oligo maps; Mohibullah and Keeney, 2017) (**a**), and in CC-seq maps in *sae2Δ* (**b**) and *sae2Δ ndt80Δ* (**c**) strains. **d**, Visualization of the relative Spo11 hotspot intensities on chromosome IV in the indicated strains. **e**, Ratio of relative Spo11 hotspot intensities  $\pm$ TEL1 on chromosome IV in *SAE2+* cells (Spo11-oligo data; upper panel) and in CC-seq maps in the presence (middle panel) and absence (lower panel) of Ndt80.

Values above zero indicate a higher DSB frequency in the presence of Tel1 and below zero a higher DSB frequency in the absence of Tel1. Fold change was smoothed to highlight the spatial trend caused by *TEL1* deletion (black line). Other chromosomes are presented in **Fig S7**. **f–g**, Heat maps of CC-seq data (*sae2Δ*) representing the  $\pm$ Tel1 effect in the presence (**f**) and absence of Ndt80 (**g**). Log2 ratio of relative hotspot strengths  $\pm$ TEL1 was binned into 50 kb intervals and plotted centred on the centromere and ranked by chromosome size.

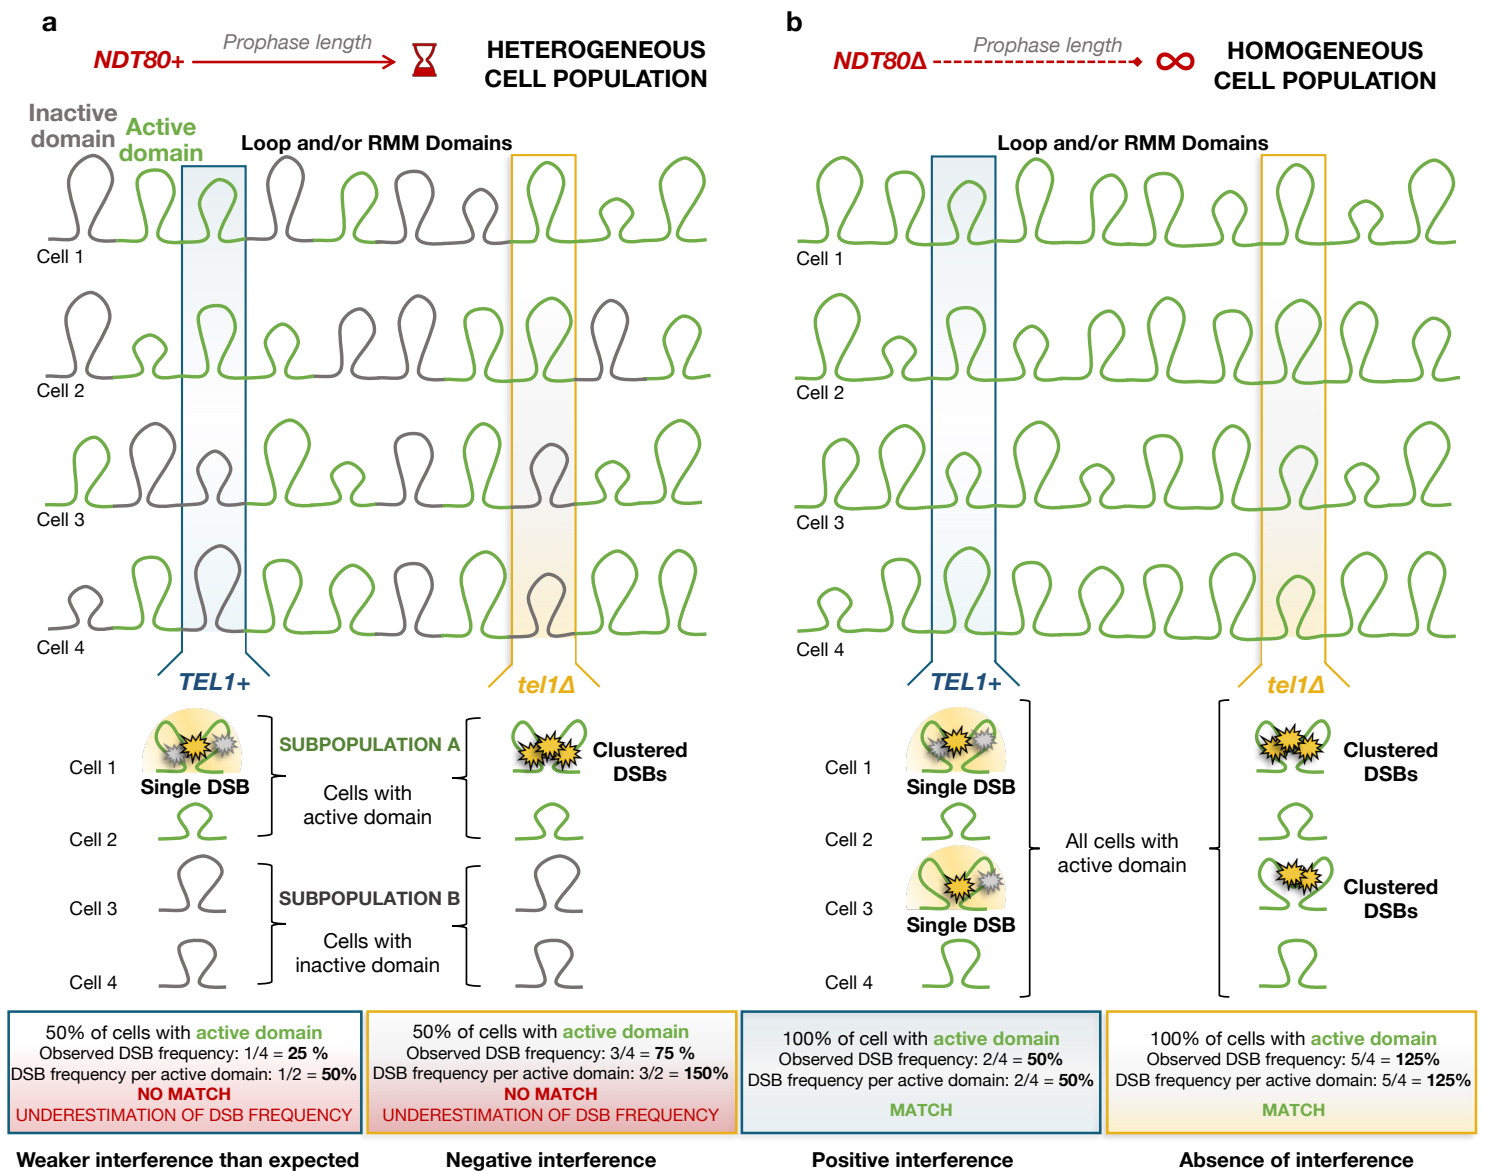

**Figure 5. Meiotic prophase length homogenises the potential of forming active domains in which DSB formation may arise.**

**a**, Schematic representation of a heterogeneous mixture of cells with active and inactive domains with differing potential for DSB formation in *NDT80+* cells. The formation of such active/inactive subdomains will bias the measurement of DSB frequency leading to lower-than-expected calculations of DSB interference. In the presence of Tel1, underestimation of the DSB probability within the active domains would generate weaker interference than expected, whereas, in the absence of Tel1 (*tel1Δ*), the lack of local DSB inhibition will cause efficient coincident cutting (DSB clustering) in the fraction of cells with the active domain, causing negative interference. In both examples we represent a situation in which 50% of the assayed population of cells—here represented with just four chromatids for simplicity—have the domain active at the tested region. **b**, We propose that deletion of *NDT80* extends the length of the meiotic prophase homogenising

the potential for domains to be activated and allowing a more accurate detection of DSB frequency per active domain. In the presence of Tel1, DSBs will arise evenly across the genome—leading to detection of positive interference, whereas in *tel1Δ* cells, the lack of negative inhibition will lead to detection of no interference. In both examples we represent a situation in which 100% of the assayed population of cells—here represented in four chromatids for simplicity—have the domain active at the tested region. Although Spo11-DSB formation arises in the context of a maturing loop-axis chromosome structure organised by cohesin, and contains chromatin loops that are within the size range (in *S. cerevisiae*) over which we infer activation to occur (<15 kb), such active domains may simply coincide with, and co-occur alongside loop formation, but not necessarily depend upon their existence, instead being driven by the assembly of pro-DSB factors such as Rec114, Mei4 and Mer2 (RMM; see discussion for further details).



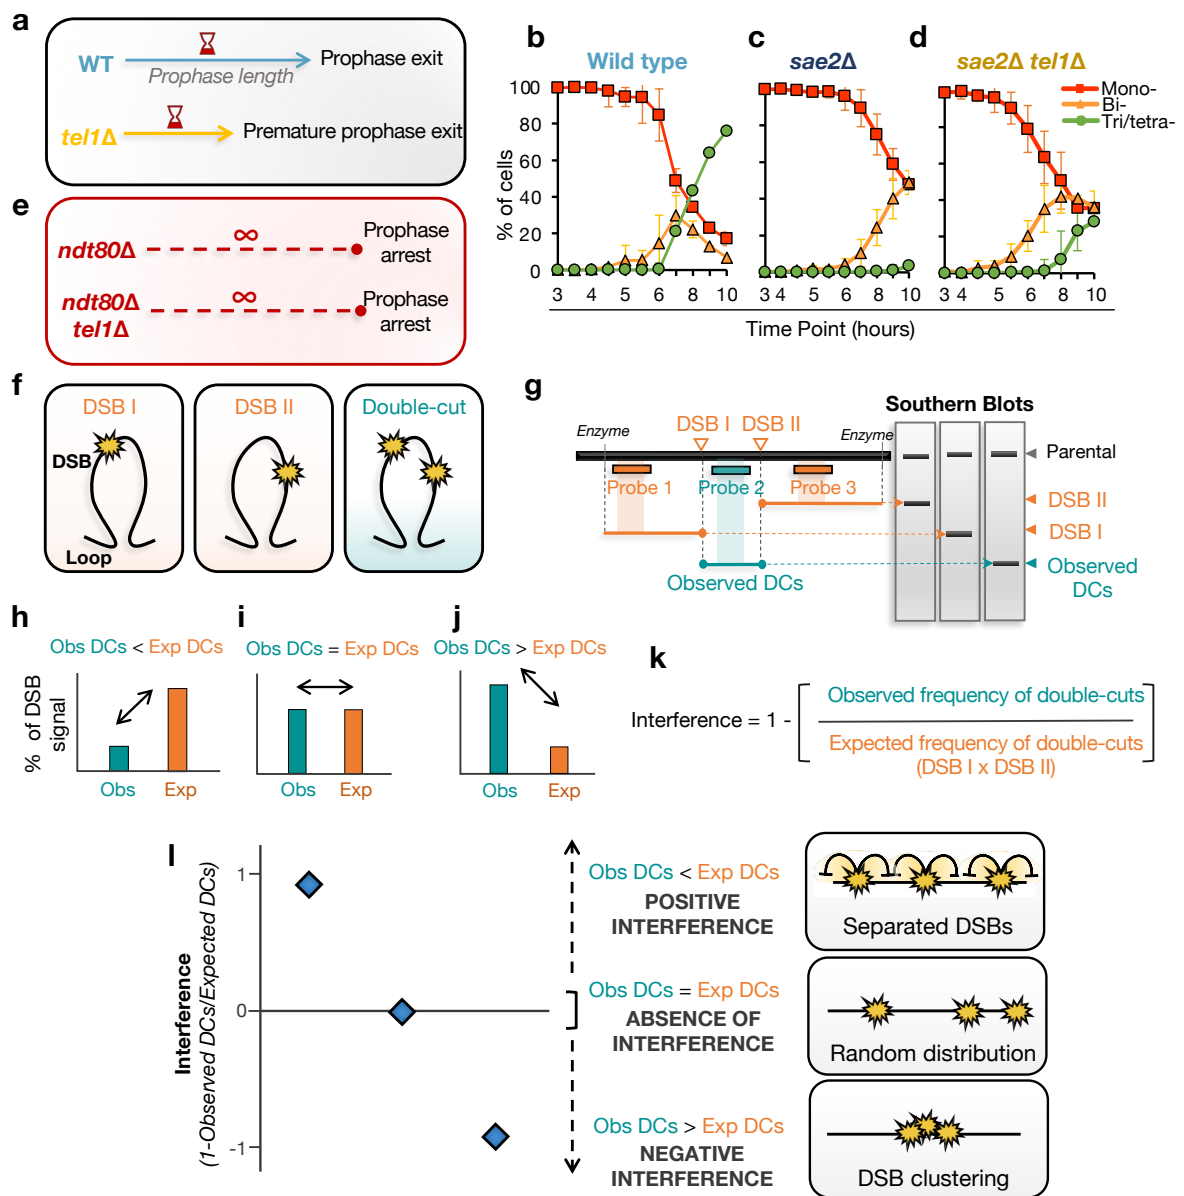

### Supplementary Figure 1. Calculating DSB interference.

**a**, Schematic representation of the potential prophase length differences between  $\pm$  Tel1. In the absence of Tel1, the checkpoint may be down-regulated resulting in a reduction of the meiotic prophase length. **b–d**, Meiotic nuclear division (MI and MII) kinetics showing the individual profiles of mono- bi-, tri/tetra-nucleate DAPI-stained cells for Wild type (**b**), *sae2* $\Delta$  (**c**) and *sae2* $\Delta$  *tel1* $\Delta$  (**d**). Summary of bi- tri- and tetra- previously presented in **Fig 1b**. **e**, Schematic representation of the expected effect of *ndt80* $\Delta$  mutation. Removal of *NDT80* generates cell cycle arrest in late meiotic prophase I and therefore equalizes the length of meiotic prophase regardless of the presence or absence of Tel1. **f–i**, Simplified schematics of the Southern blot method used to study DSB interference at specific loci. **f**, Diagram representing a theoretical loop domain containing two hotspots (DSB I and DSB II) that can arise independently or coincidentally (double-cut, DC). **g**, Diagram representing the position of the probes and fragments that would be used to detect each of the single

DSBs or the coincident double-cut by Southern blotting techniques in this theoretical scenario. The probability of both DSBs arising from independence (Expected double-cuts), can be estimated by measuring and multiplying the single DSB event frequencies. **h–j**, Three possible scenarios can result from comparing the estimated expected DC frequency with the observed DC frequency. The expected DC frequency can be higher (**h**), similar (**g**) or lower (**j**) than the observed DC frequency. **k**, The strength of interference can be calculated by subtracting subtracting from 1, the coefficient of coincidence (CoC)—which is estimated by dividing the observed frequency of DCs by the frequency expected on the assumption of independence. **i**, Interference values close to 1 indicate positive interference and thus separate DSB events. Interference values close to zero indicate absence of interference, thus random distribution of DSBs. Whereas interference values below 0 indicate negative interference and thus concerted DSB activity (DSB clustering).

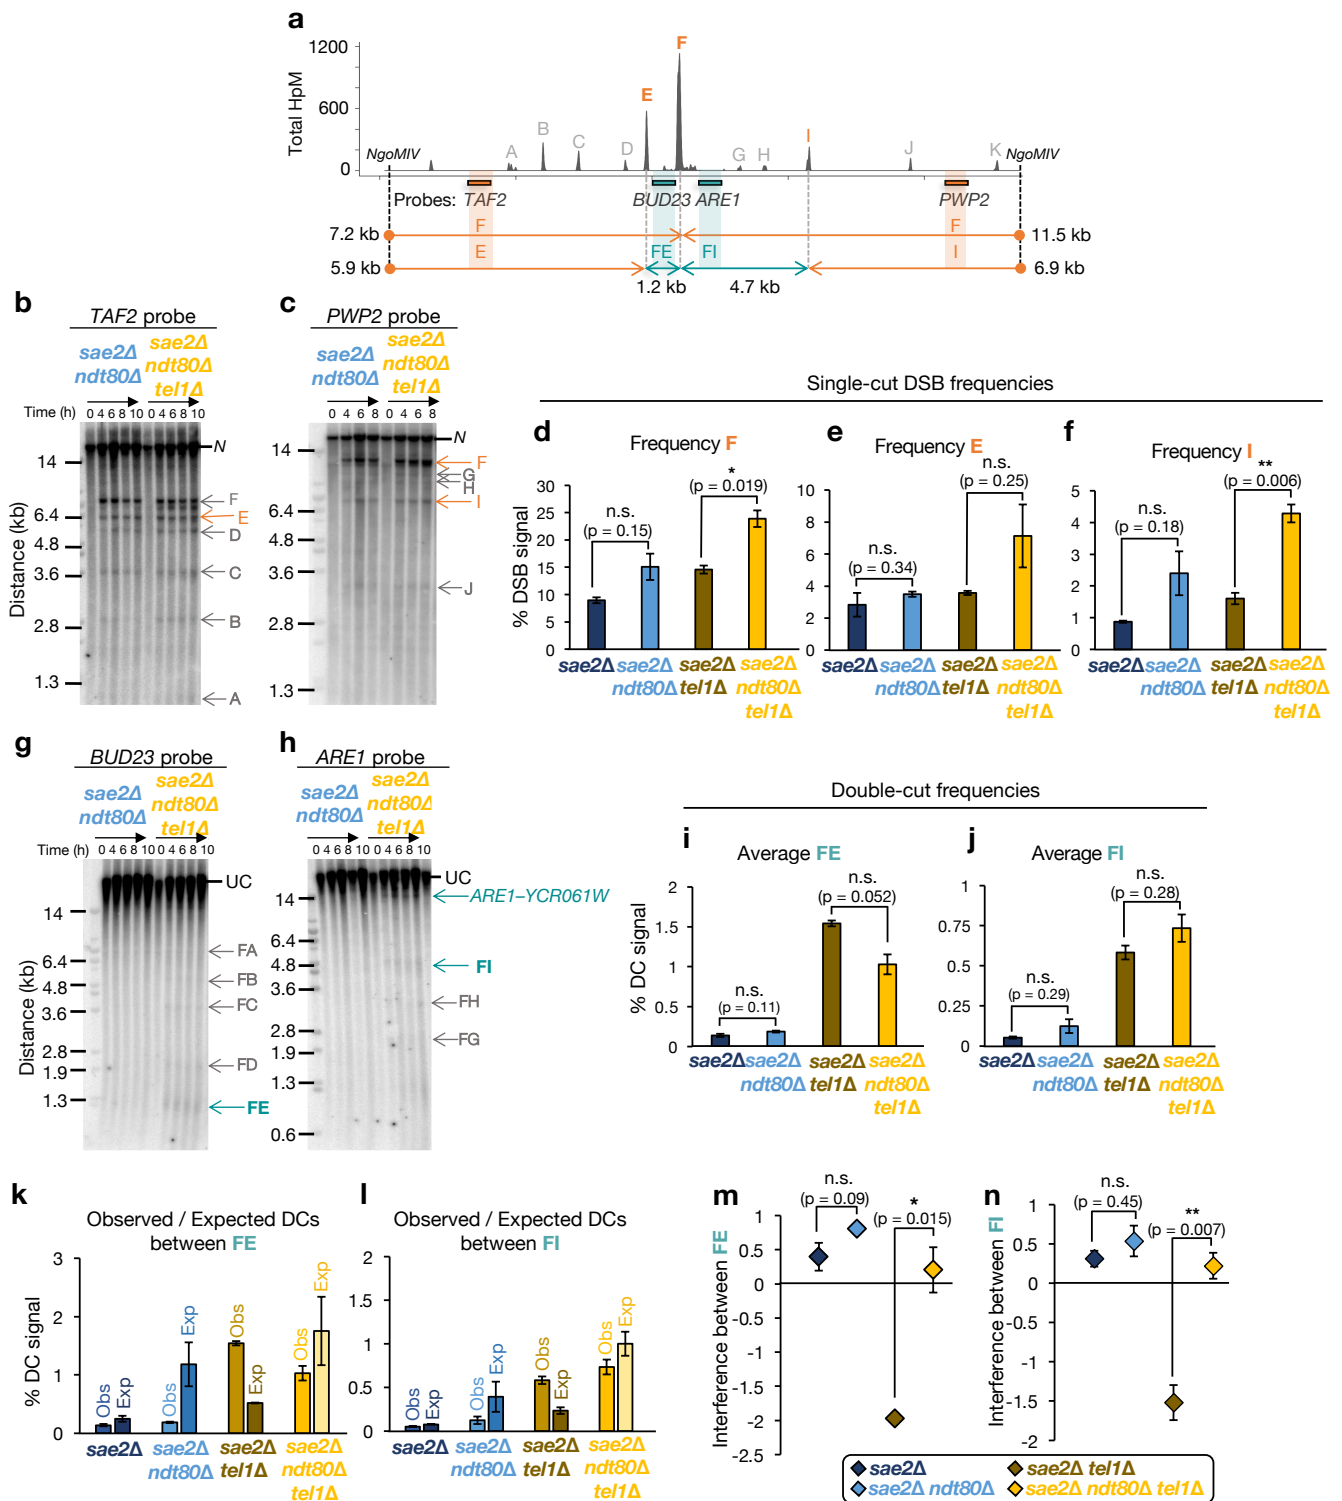

### Supplementary Figure 2. Deletion of *NDT80* ablates

negative interference at the *ARE1* hotspot. **a**, Diagram of the *ARE1* hotspot showing Spo11-DSB positions as detected by CC-seq in hits per million (HpM; Gittens et al., 2019), and, for Southern blotting experiments, the restriction enzyme sites, probes and size of fragments obtained from each probe. DSB interference was only measured between the main hotspot F-E and F-I. **b-c**, Representative Southern blots of genomic DNA isolated at the specified times hybridised with *TAF2* (**b**), and *PWP2* (**c**) probes. Quantified DSBs were marked in orange and not-quantified DSBs in grey. N, *NgoMIV* digested parental fragment. **d-f**, Quantification of F (**d**), E (**e**) and I (**e**) hotspots (average of 6–8 h time points). Estimation of F was corrected by adding on FI double-cuts measured with *ARE1* probe. **g-h**, As in **b-c** but

with undigested gDNA samples at the indicated timepoints and hybridized with *BUD23* (**g**) and *ARE1* (**h**) probes. Quantified DCs were marked in blue and not-quantified DSBs in grey. UC, Uncut parental. **i-j**, Quantification of DC signal between FE (**i**) and FI (**j**) (average of 6–8 h time points). **k-l**, Quantification of observed and expected DC frequencies between FE (**k**) and FI (**l**) using averaged data from 6–8 h time points in the indicated strains. **m-n**, DSB interference between FE (**m**) and FI (**n**) calculated for each individual repeat and then averaged (see Extended methods, “Calculation of DSB interference”). Error bars indicate SEM between individual repeats. For statistical analysis, a two-tailed t-test with equal variance samples was performed. n = 2 for *NDT80+* (from Garcia et al 2015) and n = 3 for *ndt80Δ* backgrounds.

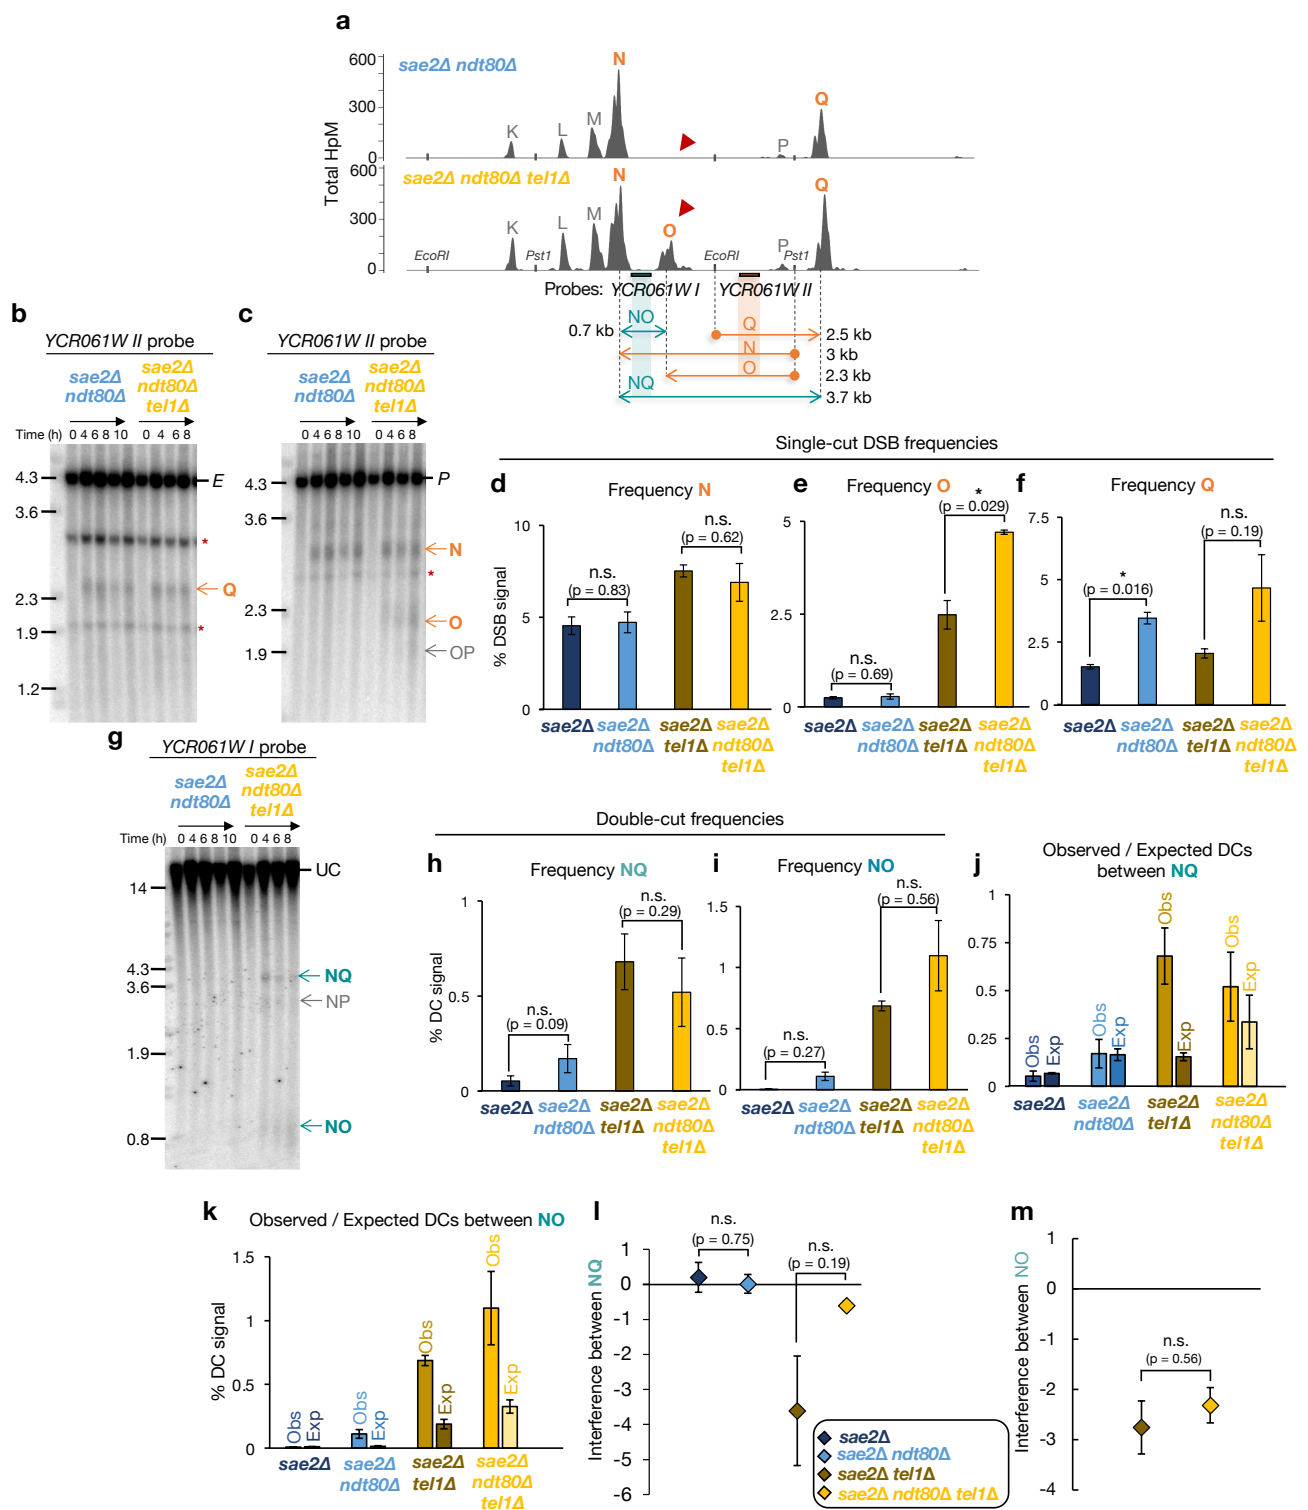

**Supplementary Figure 3. Interference at the *YCR061W* hotspot.** **a**, Diagram of the *YCR061W* hotspot showing Spo11-DSB positions as detected by CC-seq (Gittens et al., 2019) in hits per million (HpM) and, for Southern blotting experiments, the restriction enzyme sites, probes and size of fragments obtained from each probe. DSB interference was only measured between the main hotspots N-O and N-Q. **b-c**, Representative Southern blots of genomic DNA isolated at the specified times hybridised with *YCR061W II* probe. E, *EcoRI* digested parental fragment (**b**) and P, *PstI* digested parental fragment (**c**) Quantified DSBs were marked in orange and not-quantified DSBs in grey. N, *NgoMIV* digested parental fragment. **d-f**, Quantification of N (**d**), O (**e**) and Q (**f**) hotspots (average of 6–8 h time points). Estimation of N was corrected by adding on NO DCs measured with the

*YCR061W I* probe. **g**, As in **b-c** but with undigested gDNA samples at the indicated timepoints and hybridized with the *YCR061W I* probe. Quantified DCs were marked in blue and not-quantified DSBs in grey. UC, Uncut parental. **h-i**, Quantification of DC signal between NQ (**h**) and NO (**i**). **j-k**, Quantification of observed and expected DC frequencies between NQ (**j**) and NO (**k**) using averaged data from 6–8 h time points in the indicated strains. **l-m**, DSB interference between NQ (**l**) and NO (**m**) calculated for each individual repeat and then averaged (see Extended methods, “Calculation of DSB interference”). Error bars indicate SEM between individual repeats. For statistical analysis, a two-tailed t-test with equal variance samples was performed.  $n = 2$  for *NDT80+* (from Garcia et al 2015) and for *ndt80Δ* backgrounds.

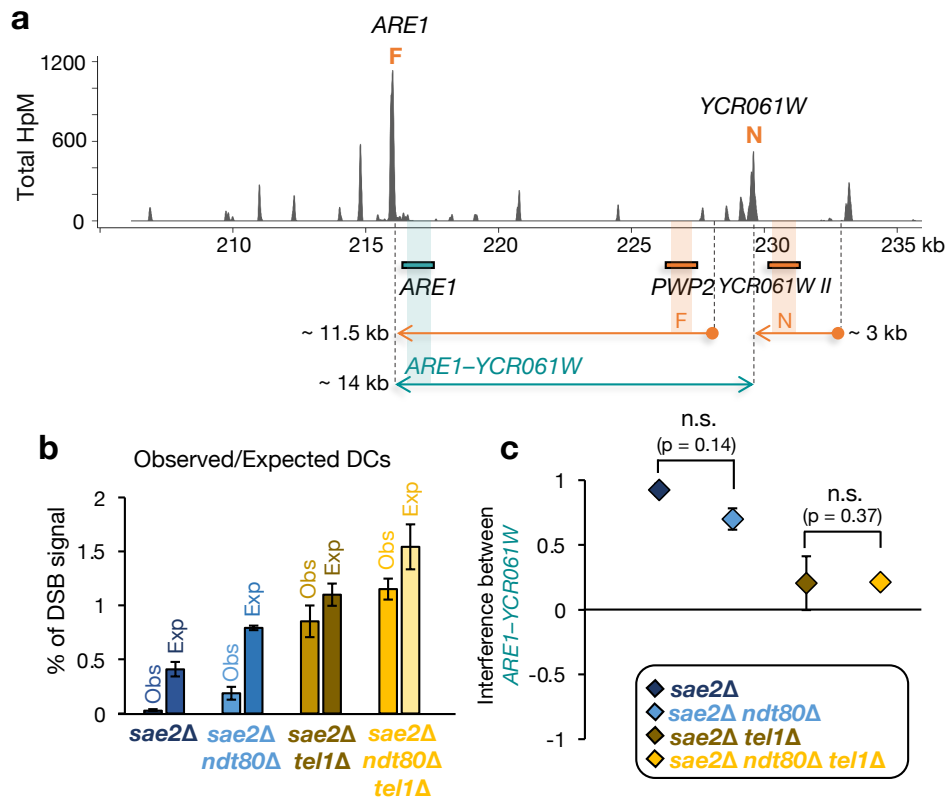

**Supplementary Figure 4. Deletion of *NDT80* does not alter *Tel1* DSB interference over medium distances (*ARE1-YCR061W*).** **a**, Diagram of the region comprised between *ARE1* and *YCR061W* hotspots showing Spo11-DSB positions as detected by CC-seq in hits per million (HpM; Gittens et al., 2019), and, for Southern blotting experiments, the probes and size of fragments obtained from each probe. Quantification of F and N was obtained from Fig S2c, and Fig S3c, respectively. Quantification of DCs between *ARE1-YCR061W* was obtained from Fig S2h. **b**, Quantification of observed

and expected DC frequencies between *ARE1-YCR061W* using averaged data from 6–8 h time points in the indicated strains. **c**, DSB interference between *ARE1-YCR061W* hotspot calculated for each individual repeat and then averaged (see Extended methods, “Calculation of DSB interference”). Error bars indicate SEM between individual repeats. For statistical analysis, a two-tailed t-test with equal variance samples was performed.  $n = 2$  for *NDT80+* (from Garcia et al 2015) and for *ndt80Δ* backgrounds.

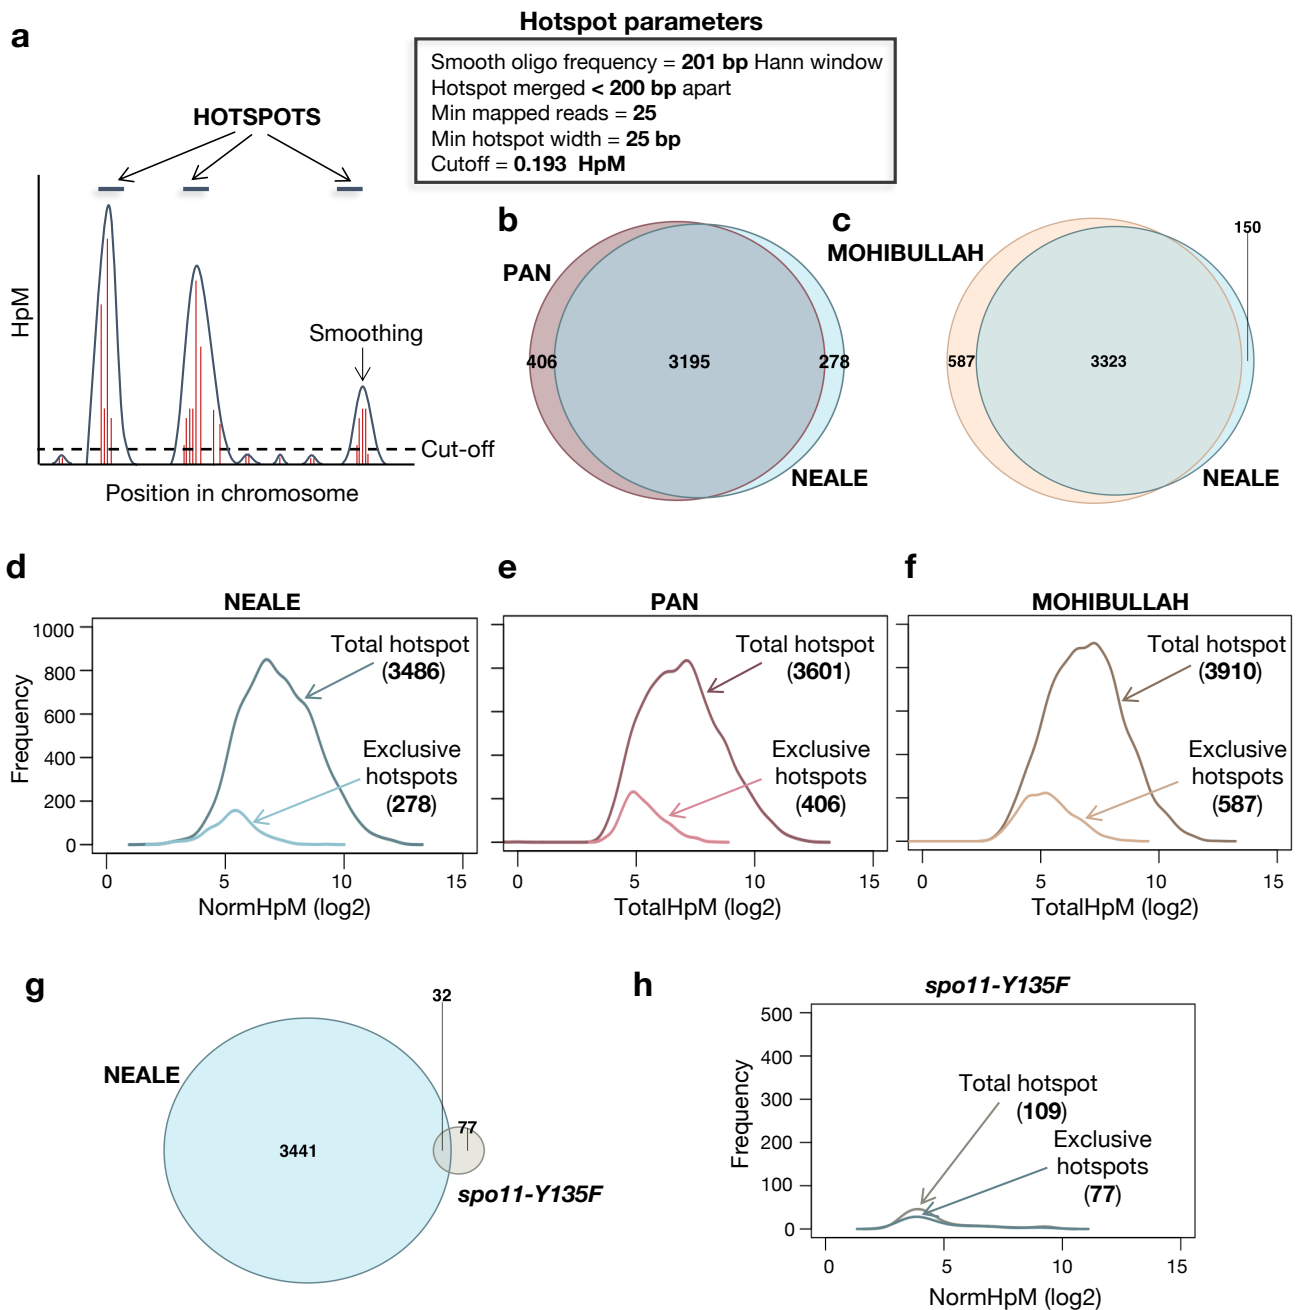

**Supplementary Figure 5. Identification of Spo11 hotspots.** **a**, Diagram representing the hotspot calling method (see Extended method, "Hotspot identification"). The frequency of HpM was smoothed using a 201 bp Hann window with a minimum length of 25 bp, 25 reads and a cut-off of 0.193 HpM to filter for noise signal. Hotspots separated by < 200 bp were merged and considered as a single hotspot. In this study, hotspots were identified from a pooled combination of *sae2Δ ndt80Δ* and *sae2Δ ndt80Δ tel1Δ* (Neale template). **b-c**, Venn diagrams of overlap between hotspots identified in

this study by CC-seq (Neale) and hotspots identified by Spo11oligo mapping by Pan et al. 2011 (**b**) or Mohibullah et al 2017 (**c**). **d-f**, Distribution of hotspot frequency for the total and exclusive hotspots identified by Neale vs Pan (**d**), Pan vs Neale (**e**) and Mohibullah vs Neale (**f**). **g**, Venn diagrams of overlap between hotspots identified in the Neale template and the non-specific hotspots identified in the *spo11-Y135F* strain. The cut-off for hotspot calling in the *sae2Δ ndt80Δ spo11-Y135F* mutant was lowered to 0.125 HpM. **h**, as in **d-f** but Neale vs *sae2Δ ndt80Δ spo11-Y135F* template.

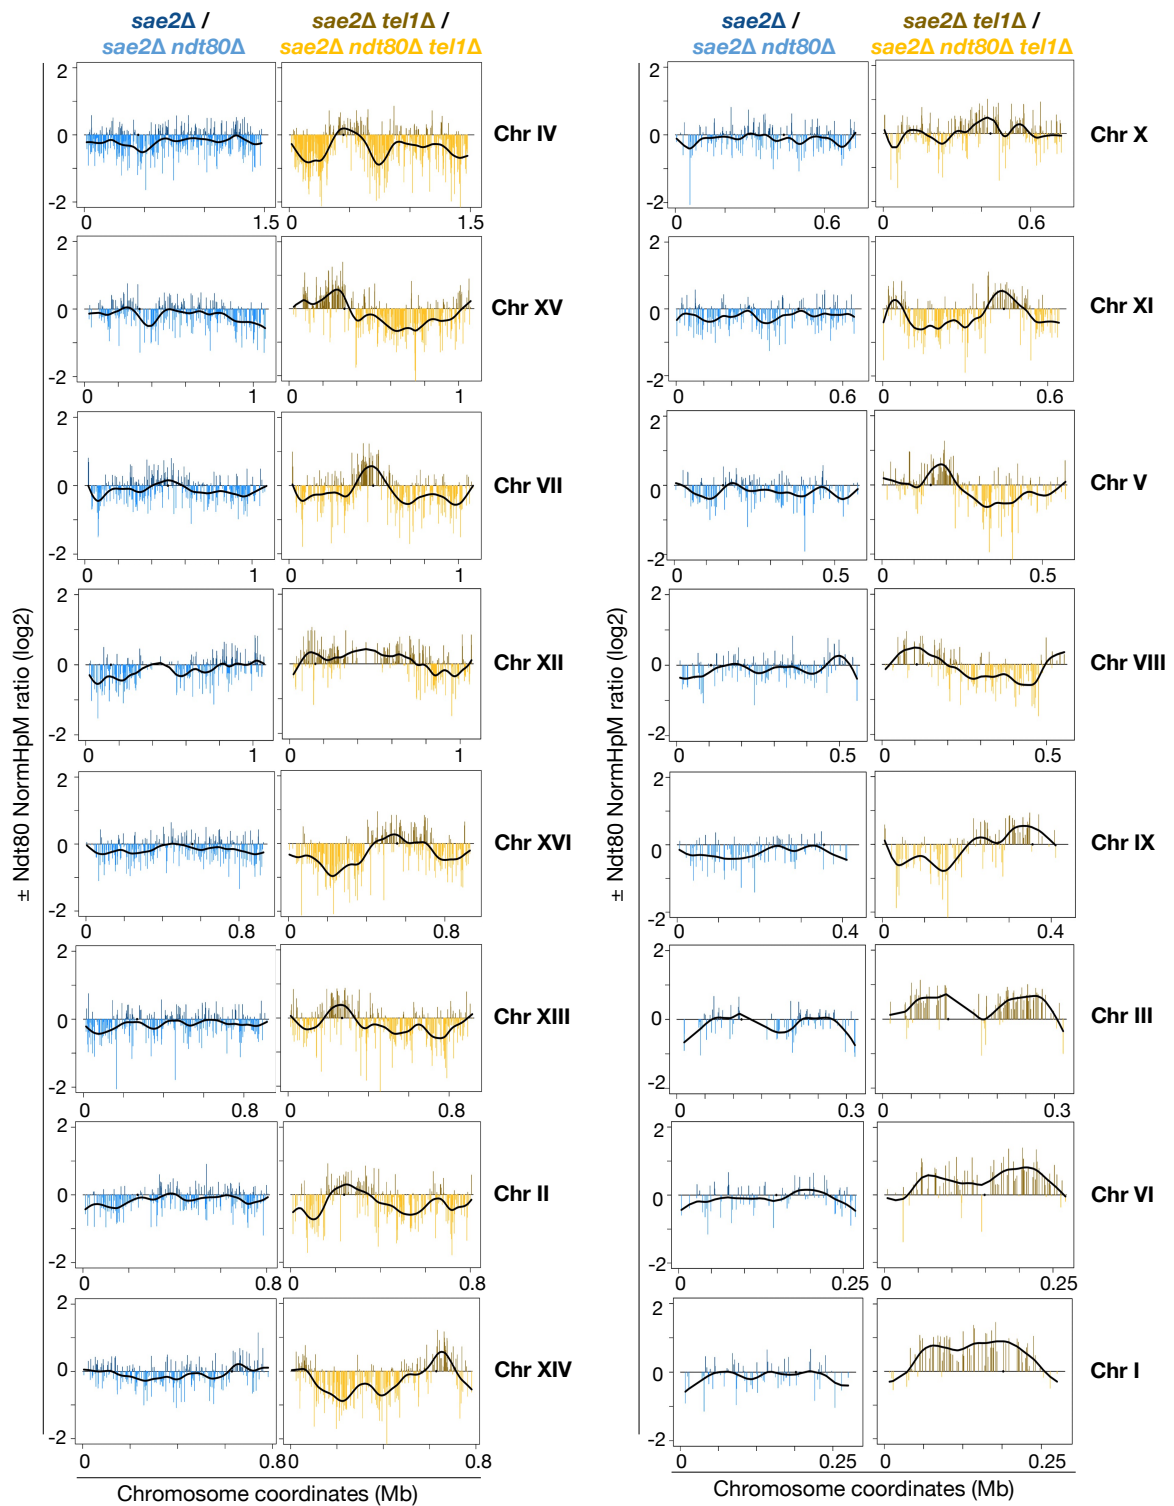

**Supplementary Figure 6. Ndt80 genome-wide effect on a per chromosome basis.** Log<sub>2</sub> ratio of relative Spo11 hotspot intensities  $\pm$ Ndt80 on all chromosomes in the presence (left panel) and absence (right panel) of Tel1. Values above zero

indicate a higher DSB frequency in the presence of Ndt80 and below zero a higher DSB frequency in the absence of Ndt80. Fold change was smoothed to highlight the spatial trend effect of Ndt80 deletion (black line).

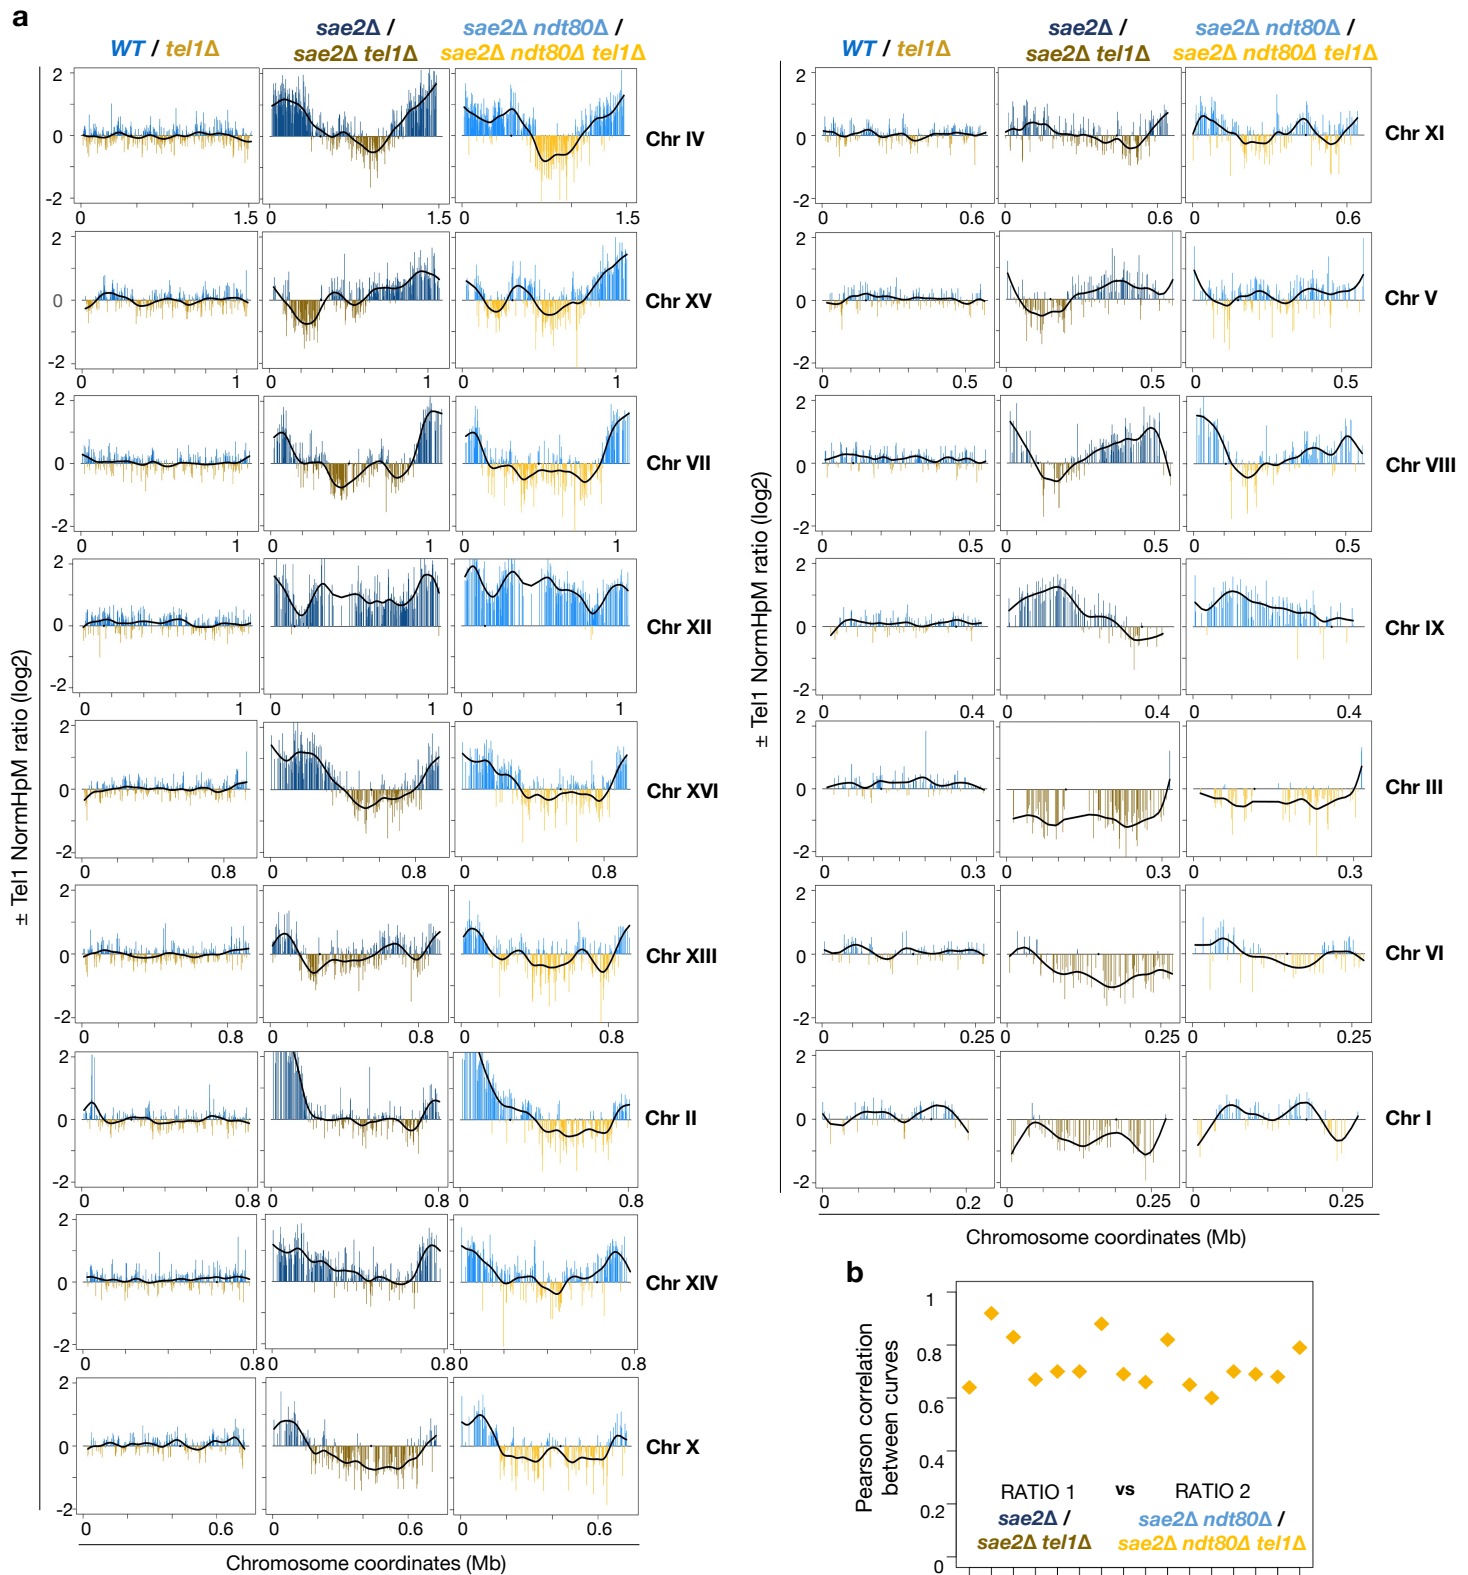

**Supplementary Figure 7. Tel1 genome-wide effect on a per-chromosome basis. a,** Log<sub>2</sub> ratio of relative Spo11 hotspot intensities  $\pm$ TEL1 on all 16 chromosomes in SAE2+ cells with Spo11-oligo technique (left panel) and *sae2* $\Delta$  cells with CC-seq technique in the presence (middle panel) and absence (right panel) of Ndt80. Values above zero indicate a

higher DSB frequency in the presence of Tel1 and below zero a higher DSB frequency in the absence of Tel1. Fold change was smoothed to highlight the spatial trend caused by TEL1 deletion (black line). **b,** Plot showing the Pearson correlation between  $\pm$  Tel1 smoothed ratios in the presence (RATIO 1) and absence of Ndt80 (RATIO 2).

**Table S1.** *S. cerevisiae* strains used in this study

| STRAIN | NAME                            | GENOTYPE                                                                                                                                                                                                                                               |
|--------|---------------------------------|--------------------------------------------------------------------------------------------------------------------------------------------------------------------------------------------------------------------------------------------------------|
| MJ315  | <i>sae2Δ</i>                    | <i>MATa/alpha ho::LYS2<sup>+</sup>, lys2<sup>+</sup>, ura3<sup>+</sup>, arg4-nsp<sup>+</sup>, leu2::hisG<sup>+</sup>, his4X::LEU2<sup>+</sup>, nuc1::LEU2<sup>+</sup>, sae2Δ::KanMX6<sup>+</sup></i>                                                   |
| VG402  | <i>sae2Δ tel1Δ</i>              | <i>MATa/alpha ho::LYS2<sup>+</sup>, lys2<sup>+</sup>, ura3<sup>+</sup>, arg4-nsp<sup>+</sup>, leu2::hisG<sup>+</sup>, his4X::LEU2<sup>+</sup>, nuc1::LEU2<sup>+</sup>, sae2Δ::KanMX4<sup>+</sup>, tel1Δ::HphMX4<sup>+</sup></i>                        |
| MJ962  | <i>sae2Δ ndt80Δ</i>             | <i>MATa/alpha ho::LYS2<sup>+</sup>, lys2<sup>+</sup>, ura3<sup>+</sup>, arg4-nsp<sup>+</sup>, leu2::hisG<sup>+</sup>, his4X::LEU2<sup>+</sup>, nuc1::LEU2<sup>+</sup>, sae2Δ::KanMX6<sup>+</sup>, ndt80Δ::LEU2<sup>+</sup></i>                         |
| MJ965  | <i>sae2Δ ndt80Δ tel1Δ</i>       | <i>MATa/alpha ho::LYS2<sup>+</sup>, lys2<sup>+</sup>, ura3<sup>+</sup>, arg4-nsp<sup>+</sup>, leu2::hisG<sup>+</sup>, his4X::LEU2<sup>+</sup>, nuc1::LEU2<sup>+</sup>, sae2Δ::KanMX6<sup>+</sup>, ndt80Δ::LEU2<sup>+</sup>, tel1Δ::HYG<sup>+</sup></i> |
| GB21   | <i>sae2Δ ndt80Δ spo11-Y135F</i> | <i>MATa/alpha ho::LYS2<sup>+</sup>, lys2<sup>+</sup>, ura3<sup>+</sup>, arg4-nsp<sup>+</sup>, leu2::hisG<sup>+</sup>, his4X::LEU2<sup>+</sup>, sae2Δ::KanMX6<sup>+</sup>, ndt80Δ::LEU2<sup>+</sup>, spo11(Y135F)::KanMX4<sup>+</sup></i>               |

**Table S2.** Oligonucleotides used in this study for Southern Blots

| PROBE             | CHR     | PRIMERS                                                                                  | DIGESTION                        | COMMENTS                                                                                                                                                             |
|-------------------|---------|------------------------------------------------------------------------------------------|----------------------------------|----------------------------------------------------------------------------------------------------------------------------------------------------------------------|
| <b>CHA1</b>       | Chr III | CHA1_F@-9: ACCAGCGAGATGTCGATAGTCTAC<br>CHA1_R@+1052: TCTGGAATATGAAATTGTCAGCG             | NA                               | Quantification of <i>HIS4::LEU2</i> and <i>leu2::hisG</i> hotspots                                                                                                   |
| <b>FRM2</b>       | Chr III | FRM2_F@+27: GCTATTACAAACCGTCGTACCATC<br>FRM2_R@+645: CATCGCTGAGGTATCATTACTTCAT           | NA                               | Quantification of double-cuts between <i>HIS4::LEU2</i> and <i>leu2::hisG</i> hotspots                                                                               |
| <b>LEU2</b>       | Chr III | LEU2_F: ATATACCATTCTAATGTCTGC<br>LEU2_R: AAGGATTTCTTAACCTCTCGGCG                         | NA                               | Quantification of double-cuts between DSB I–DSB II at <i>HIS4::LEU2</i> hotspot                                                                                      |
| <b>HIS4</b>       | Chr III | HIS4LH_F: CTAAGGAAATCCTTTGGGATCAACCC<br>HIS4LH_R: CTTGGGTCCAGGTAATCAATTTGTGACTG          | <i>Pst</i> I                     | Quantification of DSB II at <i>HIS4::LEU2</i> hotspot                                                                                                                |
| <b>MXR2</b>       | Chr III | HIS4_F@+5170: CGTGAAGTGAACGATGCC<br>HIS4_R@+5493: GCAACTGTTCCAGCCTTCACC                  | <i>Pst</i> I                     | Quantification of DSB I at <i>HIS4::LEU2</i> hotspot                                                                                                                 |
| <b>BUD23</b>      | Chr III | BUD23_F@+1: ATGTCACGTCCTGAGGAGTTGG<br>BUD23_R@+800: GTGAACCTGGAGTCTTCGCAAC               | NA                               | Quantification of double-cuts between the main <i>ARE1</i> (F) and hotspots to the left                                                                              |
| <b>ARE1</b>       | Chr III | ARE1_F@+54: ACTCAATCCGCGAGAAGCCA<br>ARE1_R@+715: TTGCCAAGTCCAACATTGCG                    | NA                               | Quantification of double-cuts between <i>ARE1</i> (F) and hotspots to the right<br><br>Quantification of double-cuts between <i>ARE1</i> and <i>YCR061W</i> hotspots |
| <b>TAF2</b>       | Chr III | TAF2_F@+23: CCACTCCTAGAGCCATTGTTAG<br>TAF2_R@+693: TCATCAAGCAAATCGACACATGG               | <i>NgoMIV</i>                    | Quantification of adjacent hotspots to the left of <i>ARE1</i> (F)                                                                                                   |
| <b>PWP2</b>       | Chr III | PWP2_F@+35: GTACGGTCTACAGGCAAGGTAAC<br>PWP2_R@+815: TTGCTGGATGGAAGGTGACACAC              | <i>NgoMIV</i>                    | Quantification of main <i>ARE1</i> (F) and adjacent hotspots to the right of <i>ARE1</i>                                                                             |
| <b>YCR061W I</b>  | Chr III | YCR061W_F@+58: CCCATGATGACATGGACATGGAC<br>YCR061W_R@+884: GGTATGTCTTGAGGAAGCAGAGG        | NA                               | Quantification of double-cuts between <i>YCR061W</i> (N) and hotspots on the right of <i>YCR061W</i>                                                                 |
| <b>YCR061W II</b> | Chr III | YCR061WII_R@+2176: TCAGAGAGAACCTCCAGTAGAGTC<br>YCR061WII_F@+1283: GGTCCACCAACATCTTCTGGAG | <i>EcoRI</i><br><br><i>Pst</i> I | Quantification of hotspots to the right of <i>YCR061W</i> (N)<br><br>Quantification of <i>YCR061W</i> main hotspots “N” and also adjacent hotspots to the right      |



**Table S3.** Spo11-DSB Mapping libraries used in this study. Mreads refers to million mapped Read 1 ends.

| Shorthand Genotype              | Library ID                             | FASTQ ID                               | Mreads |
|---------------------------------|----------------------------------------|----------------------------------------|--------|
| <i>sae2Δ</i>                    | MJ315_WT_1_6h                          | MJ315_S1_L001                          | 3.29   |
| <i>sae2Δ</i>                    | MJ315_WT_2A_6h                         | MJ315_WT_2A_6h                         | 8.70   |
| <i>sae2Δ</i>                    | MJ315_WT_3_6h                          | MJ315_WT_3_6h                          | 4.66   |
| <i>sae2Δ</i>                    | MJ315_WT_5_6h                          | MJ315_WT_5_6h                          | 3.65   |
| <i>sae2Δ</i>                    | MJ315_WT_7B_6h                         | MJ315-WT_8B_6h                         | 1.56   |
| <i>sae2Δ</i>                    | MJ315_WT_7C_6h                         | MJ315-WT_8C_6h                         | 2.12   |
| <i>sae2Δ tel1Δ</i>              | VG402_tel1D_1A_6h                      | VG402_S6_L001                          | 4.02   |
| <i>sae2Δ tel1Δ</i>              | VG402_tel1D_1B_6h                      | VG402_tel1D_1_6h                       | 5.51   |
| <i>sae2Δ tel1Δ</i>              | VG402_tel1D_2_6h                       | VG402_2_tel1D_6h                       | 4.62   |
| <i>sae2Δ tel1Δ</i>              | VG402_tel1D_3_6h                       | VG402_tel1D_3_6h                       | 3.84   |
| <i>sae2Δ tel1Δ</i>              | VG402_tel1D_4_6h                       | VG402_tel1D_4_6h                       | 4.55   |
| <i>sae2Δ ndt80Δ</i>             | MJ962_ndt80D_1_6h                      | MJ962_1 - MJ962-1_S4_L001              | 6.07   |
| <i>sae2Δ ndt80Δ</i>             | MJ962_ndt80D_2_6h                      | MJ962_2 - MJ962_ndt80D_2_6h            | 5.31   |
| <i>sae2Δ ndt80Δ</i>             | ccLLR9_MJ962_sae2Dndt80D_TC10_6h       | ccLLR9_MJ962_sae2Dndt80D_TC10_6h       | 4.93   |
| <i>sae2Δ ndt80Δ</i>             | ccLLR17_MJ962_sae2Dndt80D_TC17_6h      | ccLLR17_MJ962_sae2Dndt80D_TC17_6h      | 4.55   |
| <i>sae2Δ ndt80Δ tel1Δ</i>       | MJ965_ndt80Dtel1D_1_6h                 | MJ965_1 - MJ965-1_S5_L001              | 5.54   |
| <i>sae2Δ ndt80Δ tel1Δ</i>       | MJ965_ndt80Dtel1D_2_6h                 | MJ965_2 - MJ965_ndt80Dtel1D_2_6h       | 4.68   |
| <i>sae2Δ ndt80Δ tel1Δ</i>       | ccLLR2_MJ965_sae2Dndt80Dtel1D_TC5_6h   | ccLLR2_MJ965_sae2Dndt80Dtel1D_TC5_6h   | 4.90   |
| <i>sae2Δ ndt80Δ tel1Δ</i>       | ccLLR10_MJ965_sae2Dndt80Dtel1D_TC10_6h | ccLLR10_MJ965_sae2Dndt80Dtel1D_TC10_6h | 5.48   |
| <i>sae2Δ ndt80Δ tel1Δ</i>       | ccLLR18_MJ965_sae2Dndt80Dtel1D_TC17_6h | ccLLR18_MJ965_sae2Dndt80Dtel1D_TC17_6h | 3.65   |
| <i>sae2Δ ndt80Δ spo11-Y135F</i> | Spo11-yf-BL13-GB21-6hr                 | BL13_GB21_6hr                          | 10.86  |

**Table S4.** Hotspot calling statistics in various averaged libraries

| TEMPLATE         | STRAIN BACKGROUND                               | SIGNAL CUTOFF    | NUMBER OF CALLED HOTSPOTS | NUMBER OF HOTSPOTS AFTER rDNA HOTSPOT REMOVAL | NUMBER OF SHARED HOTSPOTS WITH NEALE TEMPLATE |
|------------------|-------------------------------------------------|------------------|---------------------------|-----------------------------------------------|-----------------------------------------------|
| PAN (2011)       | SK1 background<br>WT HA-tagged Spo11            | 0.193 HpM/bp     | 3601                      | NA                                            | 3195                                          |
| MOHIBULLAH (ref) | SK1 background<br>WT ProtA-tagged Spo11         | > 0.2 RPM per bp | 3910                      | NA                                            | 3323                                          |
| NEALE            | <i>sae2Δ ndt80Δ</i> & <i>sae2Δ ndt80Δ tel1Δ</i> | 0.193 HpM/bp     | 3486                      | 3473                                          | -                                             |
| NEALE SPO11-YF   | <i>sae2Δ spo11-Y135F</i>                        | 0.125 HpM/bp     | 110                       | 109                                           | 32                                            |

\*Hotspot general parameters: Hann smooth width = 201 bp ; Hotspot merging < 200 bp ; Min mapped reads = 25 ; Min length = 25 bp
